# Supplementary material for: Analytical Methodology for a Metabolome Atlas of Goat’s Plasma, Milk and Feces Using 1H-NMR and UHPLC-HRMS
Source: MDPI journal article supplement (doi:10.3390/metabo11100681), 2021-10-04
Supplement: s1 [file s1]

# SUPPLEMENTARY DATA

## Analytical methodology for a metabolome atlas of goat's plasma, milk and feces using <sup>1</sup>H-NMR and UHPLC-HRMS

*Cécile Martias<sup>1</sup>, Julie Gatien<sup>2</sup>, Lea Roch<sup>2</sup>, Nadine Baroukh<sup>1</sup>, Sylvie Mavel<sup>1</sup>, Antoine Lefevre<sup>1</sup>, Frédéric Montigny<sup>1</sup>, Laurent Schibler<sup>2</sup>, Patrick Emond<sup>1,3</sup>, Lydie Nadal-Desbarats<sup>1</sup>*

1 - UMR 1253, iBrain, University of Tours, Inserm, Tours, France

2 – ALLICE, Phenotyping station, Nouzilly, France

3-CHRU Tours, Biochemistry and molecular biology department, Tours, France

# SAMPLE PREPARATION

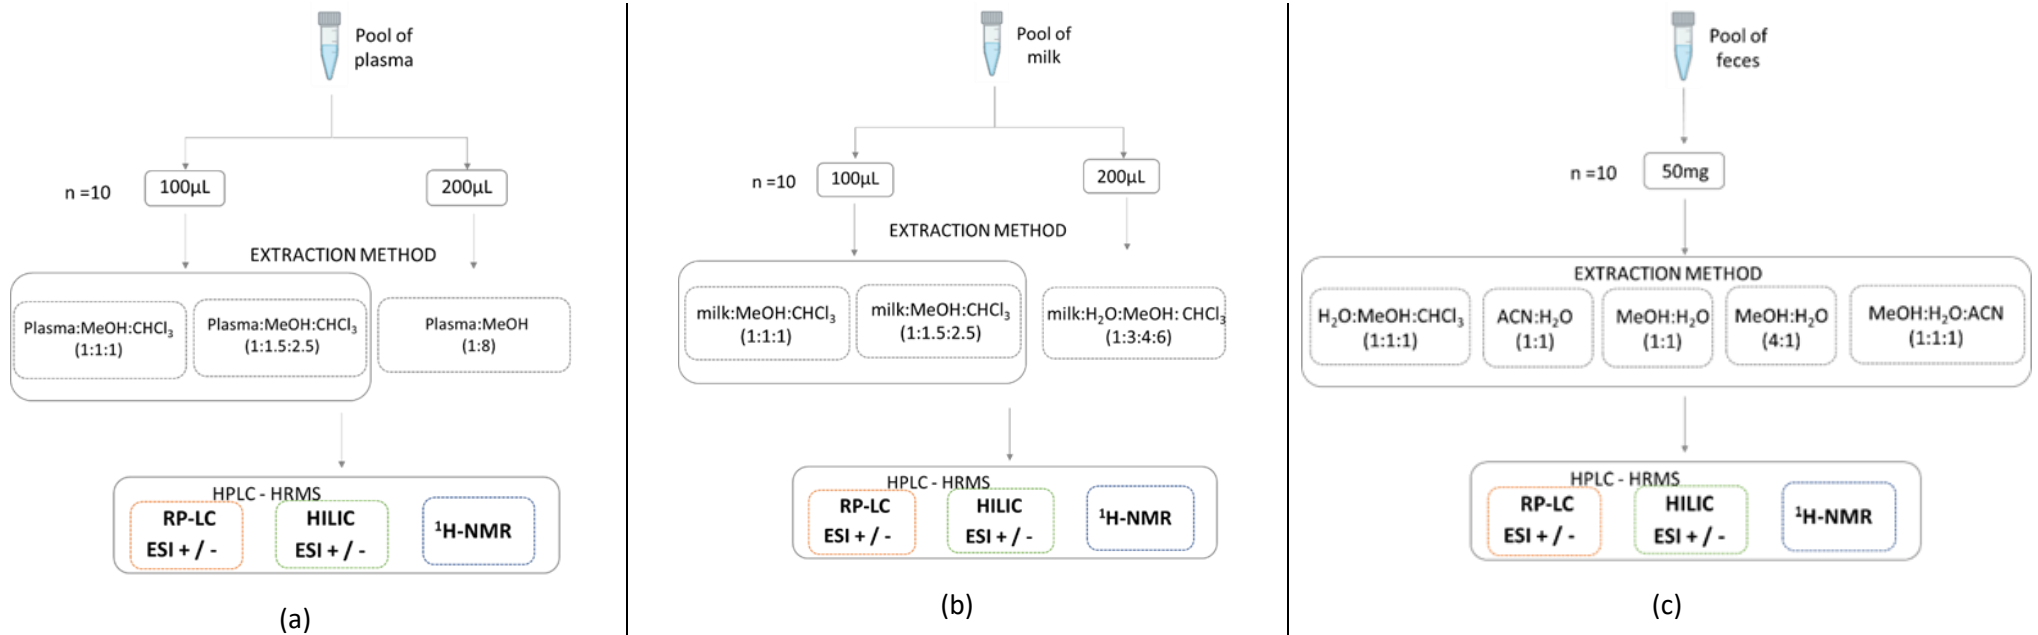

**Figure S1.** Schematic presentation of the preparation procedures applied on the pool of plasma (a), milk (b) and feces (c) for the selection of the optimum protocol for the maximum metabolome coverage by UHPLC-MS and <sup>1</sup>H-NMR.

# PLASMA

|                                                         |                         | RP-LC        | HILIC         | NMR         | Total         |
|---------------------------------------------------------|-------------------------|--------------|---------------|-------------|---------------|
| Plasma:MeOH :CHCl <sub>3</sub><br>(1 :1 :1)<br>(n=10)   | Number of metabolites : | 137          | 131           | 39          | 229           |
|                                                         | CV<30%                  | 108          | 97            | 39          | 198           |
|                                                         | CV<20%                  | 81           | 73            | 39          | 161           |
|                                                         | CV<10%                  | 32           | 31            | 29          | 78            |
|                                                         | CV % mean (min-max)     | 22% (4%-93%) | 27% (3%-135%) | 8% (4%-15%) | 18% (3%-93%)  |
| Plasma:MeOH :CHCl <sub>3</sub><br>(1 :2.5 :1)<br>(n=10) | Number of metabolites : | 145          | 129           | 36          | 230           |
|                                                         | CV<30%                  | 123          | 84            | 36          | 184           |
|                                                         | CV<20%                  | 103          | 65            | 35          | 160           |
|                                                         | CV<10%                  | 40           | 21            | 24          | 69            |
|                                                         | CV % mean (min-max)     | 18% (4%-92%) | 26% (3%-135%) | 8% (3%-20%) | 19% (3%-92%)  |
| Plasma:MeOH (1 :8)<br>(n=10)                            | Number of metabolites : | 136          | 153           | 38          | 237           |
|                                                         | CV<30%                  | 120          | 61            | 38          | 169           |
|                                                         | CV<20%                  | 98           | 33            | 38          | 140           |
|                                                         | CV<10%                  | 41           | 15            | 30          | 78            |
|                                                         | CV % mean (min-max)     | 16% (1%-50%) | 41% (2%-120%) | 6% (1%-19%) | 24% (1%-120%) |

Table S1: Number of extracted metabolites and coefficient of validation in blood for the different extraction methods using <sup>1</sup>H-NMR and UHPLC-MS

# MILK

|                                                                                 |                         | RP-LC          | HILIC          | NMR          | Total          |
|---------------------------------------------------------------------------------|-------------------------|----------------|----------------|--------------|----------------|
| Milk:MeOH :CHCl <sub>3</sub><br><br>(1 :1 :1)<br><br>(n=10)                     | Number of metabolites : | 142            | 131            | 35           | 234            |
|                                                                                 | CV<30%                  | 126            | 97             | 35           | 200            |
|                                                                                 | CV<20%                  | 111            | 58             | 35           | 166            |
|                                                                                 | CV<10%                  | 68             | 13             | 28           | 95             |
|                                                                                 | CV % mean (min-max)     | 14% ( 1%-102%) | 25% ( 1%-107%) | 7% ( 3%-17%) | 17% ( 1%-84%)  |
| Milk:MeOH :CHCl <sub>3</sub><br><br>(1 :2.5 :2.5)<br><br>(n=10)                 | Number of metabolites : | 144            | 131            | 35           | 237            |
|                                                                                 | CV<30%                  | 95             | 90             | 35           | 172            |
|                                                                                 | CV<20%                  | 69             | 49             | 34           | 125            |
|                                                                                 | CV<10%                  | 19             | 8              | 23           | 45             |
|                                                                                 | CV % mean (min-max)     | 30% ( 4%-175%) | 27% ( 1%-110%) | 9% ( 7%-20%) | 25% ( 1%-122%) |
| Milk:H <sub>2</sub> O:MeOH :CHCl <sub>3</sub><br><br>(1 :3 :4 :6)<br><br>(n=10) | Number of metabolites : | 139            | 151            | 33           | 263            |
|                                                                                 | CV<30%                  | 121            | 109            | 33           | 221            |
|                                                                                 | CV<20%                  | 107            | 107            | 32           | 187            |
|                                                                                 | CV<10%                  | 65             | 35             | 21           | 100            |
|                                                                                 | CV % mean (min-max)     | 15% ( 2%-78%)  | 20% ( 2%-84%)  | 8% ( 2%-22%) | 17% ( 2%-84%)  |

Table S2: Number of extracted metabolites and coefficient of validation in milk for the different extraction methods using <sup>1</sup>H-NMR and UHPLC-MS

# FECES

|                                                                         |                         | RP-LC         | HILIC         | NMR           | Total          |
|-------------------------------------------------------------------------|-------------------------|---------------|---------------|---------------|----------------|
| H <sub>2</sub> O:MeOH :CHCl <sub>3</sub><br><br>(1 :1 :1)<br><br>(n=10) | Number of metabolites : | 236           | 250           | 28            | 347            |
|                                                                         | CV<30%                  | 194           | 199           | 21            | 286            |
|                                                                         | CV<20%                  | 175           | 143           | 17            | 241            |
|                                                                         | CV<10%                  | 141           | 109           | 7             | 192            |
|                                                                         | CV % mean (min-max)     | 15% (2%-92%)  | 21% (3%-168%) | 21% ( 5%-53%) | 17% ( 2%-168%) |
| ACN:H <sub>2</sub> O<br><br>1 :1<br><br>(n=10)                          | Number of metabolites : | 236           | 256           | 28            | 348            |
|                                                                         | CV<30%                  | 195           | 220           | 28            | 306            |
|                                                                         | CV<20%                  | 169           | 196           | 28            | 280            |
|                                                                         | CV<10%                  | 111           | 124           | 8             | 186            |
|                                                                         | CV % mean (min-max)     | 17% (2%-103%) | 17% (3%-149%) | 11% ( 6%-17%) | 14% ( 2%-97%)  |
| MeOH:H <sub>2</sub> O<br><br>1 :1<br><br>(n=10)                         | Number of metabolites : | 238           | 262           | 28            | 355            |
|                                                                         | CV<30%                  | 198           | 222           | 28            | 313            |
|                                                                         | CV<20%                  | 187           | 191           | 26            | 289            |
|                                                                         | CV<10%                  | 137           | 132           | 13            | 215            |
|                                                                         | CV % mean (min-max)     | 15% (2%-98%)  | 16% (2%-157%) | 11% ( 5%-24%) | 14% ( 2%-157%) |
| MeOH:H <sub>2</sub> O<br>4:1<br>(n=10)                                  | Number of metabolites : | 240           | 261           | 28            | 353            |
|                                                                         | CV<30%                  | 201           | 221           | 25            | 313            |
|                                                                         | CV<20%                  | 188           | 204           | 22            | 291            |
|                                                                         | CV<10%                  | 138           | 140           | 19            | 222            |
|                                                                         | CV % mean (min-max)     | 15% (2%-99%)  | 16% (3%-119%) | 13% (4%-54%)  | 13% (2%-119%)  |
| MeOH:H <sub>2</sub> O:ACN<br>1:1:<br>(n=10)                             | Number of metabolites : | 236           | 254           | 28            | 348            |
|                                                                         | CV<30%                  | 201           | 219           | 28            | 310            |
|                                                                         | CV<20%                  | 185           | 203           | 28            | 296            |
|                                                                         | CV<10%                  | 149           | 138           | 16            | 225            |
|                                                                         | CV % mean (min-max)     | 14% (2%-95%)  | 15% (1%-119%) | 9% (5%-15%)   | 13% (1%-119%)  |

Table S3: Number of extracted metabolites and coefficient of validation in fecal for the different extraction methods using <sup>1</sup>H-NMR and UHPLC-MS

# List of metabolites found in each biological matrix or shared between two or three matrices

*Table S4: Metabolites extracted from each biological matrix according to the best preparation procedure, with a CV<30%.*

| Only in plasma                      |                                                |             |          |        |
|-------------------------------------|------------------------------------------------|-------------|----------|--------|
| Metabolite                          | Chemical class                                 | HMDB        | PubChem  | KEGG   |
| <b>Dihydroxyacetone phosphate</b>   | Acides phosphoriques                           | HMDB0001473 | 668      | C00111 |
| <b>Acetone</b>                      | Aliphatic compounds cyclic and acyclic         | HMDB0001659 | 180      | C00207 |
| <b>Dimethylglycine</b>              | Amino acids-Peptides-Derivatives               | HMDB0000092 | 673      | C01026 |
| <b>L-Cystine</b>                    | Amino acids-Peptides-Derivatives               | HMDB0000192 | 67678    | C00491 |
| <b>Thyroxine</b>                    | Amino acids-Peptides-Derivatives               | HMDB0000248 | 5819     | C01829 |
| <b>1-Hydroxy-2-naphthoate</b>       | Aromatic compounds-Vitamins-Amines             | METPA0374   |          | C03203 |
| <b>4-Hydroxycinnamic acid</b>       | Aromatic compounds-Vitamins-Amines             | HMDB0002035 | 637542   | C00811 |
| <b>Bilirubin</b>                    | Aromatic compounds-Vitamins-Amines             | HMDB0000054 | 21252250 | C00486 |
| <b>Phenylacetic acid</b>            | Aromatic compounds-Vitamins-Amines             | HMDB0000209 | 999      | C07086 |
| <b>Phenylpyruvic acid</b>           | Aromatic compounds-Vitamins-Amines             | HMDB0000205 | 997      | C00166 |
| <b>(S)-3-Hydroxyisobutyric acid</b> | Lipids: Fatty acids-Steroids-Hormones-Vitamins | HMDB0000023 | 87       | C06001 |
| <b>Methyl jasmonate</b>             | Lipids: Fatty acids-Steroids-Hormones-Vitamins | HMDB0036583 | 5367719  | C11512 |
| <b>Guanosine monophosphate</b>      | Nucleotides-Nucleosides-Derivatives            | HMDB0001397 | 6804     | C00144 |
| <b>Xanthosine</b>                   | Nucleotides-Nucleosides-Derivatives            | HMDB0000299 | 64959    | C01762 |
| <b>Pyruvic acid</b>                 | Organic acids                                  | HMDB0000243 | 1060     | C00022 |

| Only in Milk                   |                                                |             |         |        |
|--------------------------------|------------------------------------------------|-------------|---------|--------|
| Metabolite                     | Chemical class                                 | HMDB        | PubChem | KEGG   |
| <b>4-Methylcatechol</b>        | Aromatic compounds-Vitamins-Amines             | HMDB0000873 | 9958    | C06730 |
| <b>Adenosine monophosphate</b> | Nucleotides-Nucleosides-Derivatives            | HMDB0000045 | 6083    | C00020 |
| <b>ADP-glucose</b>             | Nucleotides-Nucleosides-Derivatives            | HMDB0006557 | 16500   | C00498 |
| <b>Butanal</b>                 | Aliphatic compounds cyclic and acyclic         | HMDB0003543 | 261     | C01412 |
| <b>Cellobiose</b>              | Sugars                                         | HMDB000055  | 10712   | C00185 |
| <b>D-Fructose</b>              | Sugars                                         | HMDB00660   | 5984    | C00095 |
| <b>D-Tagatose</b>              | Sugars                                         | HMDB03418   | 439312  | C00795 |
| <b>D-Xylitol</b>               | Sugars                                         | HMDB02917   | 6912    | C00379 |
| <b>Dethiobiotin</b>            | Lipids: Fatty acids-Steroids-Hormones-Vitamins | HMDB0003581 | 445027  | C01909 |
| <b>Dimethyl sulfone</b>        | Organic acids                                  | HMDB0004983 | 6213    | C11142 |
| <b>Galactaric acid</b>         | Sugars                                         | HMDB0000639 | 3037582 | C00879 |
| <b>Galactose 1-phosphate</b>   | Sugars                                         | HMDB0000645 | 123912  | C00446 |
| <b>Glucaric acid</b>           | Sugars                                         | HMDB0000663 | 33037   | C00818 |
| <b>Glycerol 3-phosphate</b>    | Lipids: Fatty acids-Steroids-Hormones-Vitamins | HMDB0000126 | 439162  | C00093 |
| <b>Heptanoic acid</b>          | Lipids: Fatty acids-Steroids-Hormones-Vitamins | HMDB0000666 | 8094    | C17714 |
| <b>Hypotaurine</b>             | Organic acids                                  | HMDB0000965 | 107812  | C00519 |
| <b>L-Fucose</b>                | Sugars                                         | HMDB0000174 | 3034656 | C01019 |
| <b>L(-)-Nicotine</b>           | Aromatic compounds-Vitamins-Amines             | HMDB0001934 | 89594   | C00745 |
| <b>Melatonin</b>               | Aromatic compounds-Vitamins-Amines             | HMDB0001389 | 896     | C01598 |
| <b>N-Methylhydantoin</b>       | Aliphatic compounds cyclic and acyclic         | HMDB03646   | 69217   | C02565 |

|                                                  |                                                |             |          |        |
|--------------------------------------------------|------------------------------------------------|-------------|----------|--------|
| <b>Oxoglutaric acid</b>                          | Lipids: Fatty acids-Steroids-Hormones-Vitamins | HMDB0000208 | 51       | C00026 |
| <b>Palatinose</b>                                | Sugars                                         | HMDB0256083 | 52994241 | C01742 |
| <b>Phenylacetylglycine</b>                       | Amino acids-Peptides-Derivatives               | HMDB00821   | 68144    | C05598 |
| <b>Phosphocreatine</b>                           | Amino acids-Peptides-Derivatives               | HMDB0001511 | 587      | C02305 |
| <b>Phosphocreatine</b>                           | Amino acids-Peptides-Derivatives               | HMDB0001511 | 587      | C02305 |
| <b>Sorbitol</b>                                  | Sugars                                         | HMDB00247   | 5780     | C00794 |
| <b>Sucrose</b>                                   | Sugars                                         | HMDB0000258 | 5988     | C00089 |
| <b>Theophylline</b>                              | Aromatic compounds-Vitamins-Amines             | HMDB0001889 | 2153     | C07130 |
| <b>Uridine-5-diphospho-n-acetylglucosamine</b>   | Nucleotides-Nucleosides-Derivatives            | HMDB00290   | 445675   | C00043 |
| <b>Uridine diphosphate-N-acetylgalactosamine</b> | Nucleotides-Nucleosides-Derivatives            | HMDB0000304 | 1167     | C00203 |
| <b>Uridine diphosphate glucose</b>               | Sugars                                         | HMDB0000286 | 53477679 | C00029 |
| <b>Uridine diphosphategalactose</b>              | Sugars                                         | HMDB0000302 | 18068    | C00052 |

| Milk Plasma                         |                                                |             |          |        |
|-------------------------------------|------------------------------------------------|-------------|----------|--------|
| Metabolite                          | Chemical class                                 | HMDB        | PubChem  | KEGG   |
| <b>Glycolaldehyde dimer</b>         | Aliphatic compounds cyclic and acyclic         |             | 186078   |        |
| <b>Gamma-Aminobutyric acid</b>      | Amino acids-Peptides-Derivatives               | HMDB0000112 | 223130   | C00334 |
| <b>Dimethylamine</b>                | Aromatic compounds-Vitamins-Amines             | HMDB0000087 | 674      | C00543 |
| <b>Theobromine</b>                  | Aromatic compounds-Vitamins-Amines             | HMDB0002825 | 5429     | C07480 |
| <b>3-Hydroxybutyric acid</b>        | Lipids: Fatty acids-Steroids-Hormones-Vitamins | HMDB0000357 | 441      | C01089 |
| <b>Lithocholytaurine</b>            | Lipids: Fatty acids-Steroids-Hormones-Vitamins | HMDB0000722 | 53477716 | C02592 |
| <b>3-Hydroxymethylglutaric acid</b> | Organic acids                                  | HMDB0000355 | 1662     | C03761 |
| <b>Acetoacetic acid</b>             | Organic acids                                  | HMDB0000060 | 96       | C00164 |
| <b>Citric acid</b>                  | Organic acids                                  | HMDB0000094 | 311      | C00158 |
| <b>Methylmalonic acid</b>           | Organic acids                                  | HMDB0000202 | 487      | C02170 |
| <b>Allose</b>                       | Sugars                                         | HMDB0001151 | 12285879 | C01487 |
| <b>Alpha-Lactose</b>                | Sugars                                         | HMDB0000186 | 84571    | C00243 |
| <b>D-Galactose</b>                  | Sugars                                         | HMDB0000143 | 439357   | C00984 |
| <b>L-Sorbose</b>                    | Sugars                                         | HMDB0001266 | 441484   | C08356 |

| Milk Feces                                |                                                |             |         |        |
|-------------------------------------------|------------------------------------------------|-------------|---------|--------|
| Metabolite                                | Chemical class                                 | HMDB        | PubChem | KEGG   |
| <b>1-Aminocyclopropanecarboxylic acid</b> | Amino acids-Peptides-Derivatives               | HMDB0036458 | 535     | C01234 |
| <b>2-Hydroxypyridine</b>                  | Aromatic compounds-Vitamins-Amines             | HMDB0013751 | 8871    | C02502 |
| <b>3-Aminoisobutanoic acid</b>            | Amino acids-Peptides-Derivatives               | HMDB0003911 | 64956   | C05145 |
| <b>3-Methyladenine</b>                    | Aromatic compounds-Vitamins-Amines             | HMDB0011600 | 1673    | C00913 |
| <b>4-Hydroxybenzaldehyde</b>              | Aromatic compounds-Vitamins-Amines             | HMDB0011718 | 126     | C00633 |
| <b>5-Hydroxylysine</b>                    | Amino acids-Peptides-Derivatives               | HMDB0000450 | 4433    | C16741 |
| <b>Acetamide</b>                          | Aromatic compounds-Vitamins-Amines             | HMDB0031645 | 178     | C06244 |
| <b>Anserine</b>                           | Amino acids-Peptides-Derivatives               | HMDB0000194 | 112072  | C01262 |
| <b>Cholic acid</b>                        | Lipids: Fatty acids-Steroids-Hormones-Vitamins | HMDB0000619 | 221493  | C00695 |
| <b>Citraconic acid</b>                    | Lipids: Fatty acids-Steroids-Hormones-Vitamins | HMDB0000634 | 643798  | C02226 |
| <b>Corticosterone</b>                     | Lipids: Fatty acids-Steroids-Hormones-Vitamins | HMDB0001547 | 5753    | C02140 |
| <b>Cortisol</b>                           | Lipids: Fatty acids-Steroids-Hormones-Vitamins | HMDB0000063 | 657311  | C00735 |
| <b>Cortisol-21-acetate</b>                | Lipids: Fatty acids-Steroids-Hormones-Vitamins |             | 5744    | C02821 |
| <b>Cyclic AMP</b>                         | Nucleotides-Nucleosides-Derivatives            | HMDB0000058 | 6076    | C00575 |
| <b>Diacetyl</b>                           | Aliphatic compounds cyclic and acyclic         | HMDB0003407 | 650     | C00741 |

|                                                |                                                |             |          |        |
|------------------------------------------------|------------------------------------------------|-------------|----------|--------|
| <b>Epinephrine</b>                             | Aromatic compounds-Vitamins-Amines             | HMDB0000068 | 5816     | C00788 |
| <b>Ethanolamine</b>                            | Aliphatic compounds cyclic and acyclic         | HMDB0000149 | 700      | C00189 |
| <b>Fumaric acid</b>                            | Lipids: Fatty acids-Steroids-Hormones-Vitamins | HMDB0000134 | 444972   | C00122 |
| <b>Glucosamine 6-phosphate</b>                 | Sugars                                         | HMDB0001254 | 439217   | C00352 |
| <b>Glucose 6-phosphate</b>                     | Sugars                                         | HMDB0001401 | 5958     | C00092 |
| <b>Glyceraldehyde-3-phosphatediethylacetal</b> | Aliphatic compounds cyclic and acyclic         |             | 3334922  |        |
| <b>Imidazoleacetic acid</b>                    | Aromatic compounds-Vitamins-Amines             | HMDB0002024 | 96215    | C02835 |
| <b>Indolepyruvate</b>                          | Aromatic compounds-Vitamins-Amines             | HMDB0060484 | 803      | C00331 |
| <b>Kynurenic acid</b>                          | Amino acids-Peptides-Derivatives               | HMDB0000715 | 3845     | C01717 |
| <b>L-Acetylcarnitine</b>                       | Lipids: Fatty acids-Steroids-Hormones-Vitamins | HMDB0000201 | 7045767  | C02571 |
| <b>L-Allothreonine</b>                         | Amino acids-Peptides-Derivatives               | HMDB0004041 | 99289    | C05519 |
| <b>L-Dihydroorotic acid</b>                    | Aliphatic compounds cyclic and acyclic         | HMDB0003349 | 439216   | C00337 |
| <b>Mannitol</b>                                | Sugars                                         | HMDB0000765 | 6251     | C00392 |
| <b>N-Acetyl-D-glucosamine</b>                  | Sugars                                         | HMDB0000215 | 439174   | C00140 |
| <b>N-Acetylgalactosamine</b>                   | Sugars                                         | HMDB0000212 | 84265    | C01074 |
| <b>N-Acetyl-L-methionine</b>                   | Amino acids-Peptides-Derivatives               | HMDB0011745 | 6180     | C02712 |
| <b>N-Acetylmannosamine</b>                     | Sugars                                         | HMDB0001129 | 11096158 | C00645 |
| <b>Niacinamide</b>                             | Aromatic compounds-Vitamins-Amines             | HMDB0001406 | 936      | C00153 |
| <b>Nicotinic acid</b>                          | Aromatic compounds-Vitamins-Amines             | HMDB0001488 | 938      | C00253 |

|                                  |                                        |             |        |        |
|----------------------------------|----------------------------------------|-------------|--------|--------|
| <b>N-Methyltryptamine</b>        | Aromatic compounds-Vitamins-Amines     | HMDB0004370 | 6088   | C06213 |
| <b>N-Trimethyllysine</b>         | Amino acids-Peptides-Derivatives       |             | 440121 | C03793 |
| <b>Oxfenicine</b>                | Amino acids-Peptides-Derivatives       | HMDB0246152 | 36143  | D05292 |
| <b>Pantolactone</b>              | Aliphatic compounds cyclic and acyclic | HMDB0059876 | 439368 | C01012 |
| <b>Pterin</b>                    | Aromatic compounds-Vitamins-Amines     | HMDB0000802 | 73000  | C00715 |
| <b>Pyrrole-2-carboxylic acid</b> | Amino acids-Peptides-Derivatives       | HMDB0004230 | 12473  | C05942 |
| <b>Riboflavin</b>                | Aromatic compounds-Vitamins-Amines     | HMDB0000244 | 493570 | C00255 |
| <b>Salicyluric acid</b>          | Aromatic compounds-Vitamins-Amines     | HMDB0000840 | 10253  | C07588 |
| <b>Thymine</b>                   | Aromatic compounds-Vitamins-Amines     | HMDB0000262 | 1135   | C00178 |
| <b>trans-Aconitic acid</b>       | Organic acids                          | HMDB0000958 | 444212 | C02341 |
| <b>trans-Ferulic acid</b>        | Aromatic compounds-Vitamins-Amines     | HMDB0000954 | 445858 | C01494 |
| <b>Tryptophanol</b>              | Aromatic compounds-Vitamins-Amines     | HMDB0003447 | 10685  | C00955 |

| Milk Feces Plasma                         |                                        |             |         |        |
|-------------------------------------------|----------------------------------------|-------------|---------|--------|
| Metabolite                                | Chemical class                         | HMDB        | PubChem | KEGG   |
| Acetylcholine                             | Aliphatic compounds cyclic and acyclic | HMDB0000895 | 6060    | C01996 |
| Allantoin                                 | Aliphatic compounds cyclic and acyclic | HMDB0000462 | 204     | C01551 |
| Biotin                                    | Aliphatic compounds cyclic and acyclic | HMDB0000030 | 171548  | C00120 |
| Choline                                   | Aliphatic compounds cyclic and acyclic | HMDB0000097 | 305     | C00114 |
| Creatinine                                | Aliphatic compounds cyclic and acyclic | HMDB0000562 | 588     | C00791 |
| Cyclohexane-1,2-Diol                      | Aliphatic compounds cyclic and acyclic |             | 13601   | C03739 |
| L-Carnitine                               | Aliphatic compounds cyclic and acyclic | HMDB0000062 | 2724480 | C00318 |
| Methylguanidine                           | Aliphatic compounds cyclic and acyclic | HMDB0001522 | 10111   | C02294 |
| O-Phosphoethanolamine                     | Aliphatic compounds cyclic and acyclic | HMDB0000224 | 1015    | C00346 |
| Pantothenic acid                          | Aliphatic compounds cyclic and acyclic | HMDB0000210 | 6613    | C00864 |
| Phosphorylcholine                         | Aliphatic compounds cyclic and acyclic | HMDB0001565 | 8691    | C00588 |
| Propanal                                  | Aliphatic compounds cyclic and acyclic | HMDB0003366 | 527     | C00479 |
| Trimethylamine                            | Aliphatic compounds cyclic and acyclic | HMDB0000906 | 1146    | C00565 |
| Ureidopropionic acid                      | Aliphatic compounds cyclic and acyclic | HMDB0000026 | 111     | C02642 |
| 2,4-Dihydroxypyrimidine-5-carboxylic acid | Amino acids-Peptides-Derivatives       |             | 90301   | C03030 |
| 3-Methylhistidine                         | Amino acids-Peptides-Derivatives       | HMDB0000479 | 64969   | C01152 |
| 4-Hydroxy-L-proline                       | Amino acids-Peptides-Derivatives       | HMDB0006055 | 69248   | C01015 |
| 5-Aminolevulinic acid                     | Amino acids-Peptides-Derivatives       | HMDB0001149 | 137     | C00430 |

|                                  |                                  |             |        |        |
|----------------------------------|----------------------------------|-------------|--------|--------|
| <b>Acetylglycine</b>             | Amino acids-Peptides-Derivatives | HMDB0000532 | 10972  |        |
| <b>Beta-Alanine</b>              | Amino acids-Peptides-Derivatives | HMDB0000056 | 239    | C00099 |
| <b>Betaine</b>                   | Amino acids-Peptides-Derivatives | HMDB0000043 | 247    | C00719 |
| <b>Citrulline</b>                | Amino acids-Peptides-Derivatives | HMDB0000904 | 9750   | C00327 |
| <b>Creatine</b>                  | Amino acids-Peptides-Derivatives | HMDB0000064 | 586    | C00300 |
| <b>Formyl-L-methionylpeptide</b> | Amino acids-Peptides-Derivatives |             | 13611  | C11439 |
| <b>Glycine</b>                   | Amino acids-Peptides-Derivatives | HMDB0000123 | 750    | C00037 |
| <b>Guanidoacetic acid</b>        | Amino acids-Peptides-Derivatives | HMDB0000128 | 763    | C00581 |
| <b>Hippuric acid</b>             | Amino acids-Peptides-Derivatives | HMDB0000714 | 464    | C01586 |
| <b>L-Arginine</b>                | Amino acids-Peptides-Derivatives | HMDB0000517 | 6322   | C00062 |
| <b>L-Asparagine</b>              | Amino acids-Peptides-Derivatives | HMDB0000168 | 6267   | C00152 |
| <b>L-Aspartic acid</b>           | Amino acids-Peptides-Derivatives | HMDB0000191 | 5960   | C00049 |
| <b>L-Glutamic acid</b>           | Amino acids-Peptides-Derivatives | HMDB0000148 | 33032  | C00025 |
| <b>L-Glutamine</b>               | Amino acids-Peptides-Derivatives | HMDB0000641 | 5961   | C00064 |
| <b>L-Histidine</b>               | Amino acids-Peptides-Derivatives | HMDB0000177 | 6274   | C00135 |
| <b>L-Homoserine</b>              | Amino acids-Peptides-Derivatives | HMDB0000719 | 12647  | C00263 |
| <b>L-Isoleucine</b>              | Amino acids-Peptides-Derivatives | HMDB0000172 | 6306   | C00407 |
| <b>L-Kynurenine</b>              | Amino acids-Peptides-Derivatives | HMDB0000684 | 161166 | C00328 |
| <b>L-Leucine</b>                 | Amino acids-Peptides-Derivatives | HMDB0000687 | 6106   | C00123 |
| <b>L-Lysine</b>                  | Amino acids-Peptides-Derivatives | HMDB0000182 | 5962   | C00047 |
| <b>L-Methionine</b>              | Amino acids-Peptides-Derivatives | HMDB0000696 | 6137   | C00073 |

|                                          |                                    |             |        |        |
|------------------------------------------|------------------------------------|-------------|--------|--------|
| <b>L-Norleucine</b>                      | Amino acids-Peptides-Derivatives   | HMDB0001645 | 21236  | C01933 |
| <b>L-Phenylalanine</b>                   | Amino acids-Peptides-Derivatives   | HMDB0000159 | 6140   | C00079 |
| <b>L-Proline</b>                         | Amino acids-Peptides-Derivatives   | HMDB0000162 | 145742 | C00148 |
| <b>L-Serine</b>                          | Amino acids-Peptides-Derivatives   | HMDB0000187 | 5951   | C00065 |
| <b>L-Threonine</b>                       | Amino acids-Peptides-Derivatives   | HMDB0000167 | 6288   | C00188 |
| <b>L-Tryptophan</b>                      | Amino acids-Peptides-Derivatives   | HMDB0000929 | 6305   | C00078 |
| <b>L-Tyrosine</b>                        | Amino acids-Peptides-Derivatives   | HMDB0000158 | 6057   | C00082 |
| <b>L-Valine</b>                          | Amino acids-Peptides-Derivatives   | HMDB0000883 | 6287   | C00183 |
| <b>N-Acetyl-L-alanine</b>                | Amino acids-Peptides-Derivatives   | HMDB0000766 | 88064  |        |
| <b>N-Acetyl-L-phenylalanine</b>          | Amino acids-Peptides-Derivatives   | HMDB0000512 | 74839  | C03519 |
| <b>N-Acetyl-leucine</b>                  | Amino acids-Peptides-Derivatives   | HMDB0011756 | 70912  | C02710 |
| <b>N-Acetylserine</b>                    | Amino acids-Peptides-Derivatives   | HMDB0002931 | 65249  |        |
| <b>N-acetyltryptophan</b>                | Amino acids-Peptides-Derivatives   | HMDB0013713 | 700653 |        |
| <b>Ornithine</b>                         | Amino acids-Peptides-Derivatives   | HMDB0000214 | 6262   | C00077 |
| <b>Orotic acid</b>                       | Amino acids-Peptides-Derivatives   | HMDB0000226 | 967    | C00295 |
| <b>Pipecolic acid</b>                    | Amino acids-Peptides-Derivatives   | HMDB0000070 | 849    | C00408 |
| <b>Pyroglutamic acid</b>                 | Amino acids-Peptides-Derivatives   | HMDB0000267 | 7405   | C01879 |
| <b>Sarcosine</b>                         | Amino acids-Peptides-Derivatives   | HMDB0000271 | 1088   | C00213 |
| <b>2-Aminophenol</b>                     | Aromatic compounds-Vitamins-Amines | METPA0236   |        | C01987 |
| <b>3-(2-Hydroxyphenyl)propanoic acid</b> | Aromatic compounds-Vitamins-Amines | HMDB0033752 | 873    | C01198 |
| <b>3-Hydroxyphenylacetic acid</b>        | Aromatic compounds-Vitamins-Amines | HMDB0000440 | 12122  | C05593 |

|                                        |                                    |             |        |        |
|----------------------------------------|------------------------------------|-------------|--------|--------|
| <b>3-Methyldioxyindole</b>             | Aromatic compounds-Vitamins-Amines | HMDB0004186 | 151066 | C05834 |
| <b>3,4-Dihydroxybenzeneacetic acid</b> | Aromatic compounds-Vitamins-Amines | HMDB0001336 | 547    | C01161 |
| <b>5-Hydroxyindoleacetic acid</b>      | Aromatic compounds-Vitamins-Amines | HMDB0000763 | 1826   | C05635 |
| <b>Adenine</b>                         | Aromatic compounds-Vitamins-Amines | HMDB0000034 | 190    | C00147 |
| <b>Benzyl alcohol</b>                  | Aromatic compounds-Vitamins-Amines | HMDB0003119 | 244    | C03485 |
| <b>Cytosine</b>                        | Aromatic compounds-Vitamins-Amines | HMDB0000630 | 597    | C00380 |
| <b>Gentisic acid</b>                   | Aromatic compounds-Vitamins-Amines | HMDB0000152 | 3469   | C00628 |
| <b>Guanine</b>                         | Aromatic compounds-Vitamins-Amines | HMDB0000132 | 764    | C00242 |
| <b>Homogentisic acid</b>               | Aromatic compounds-Vitamins-Amines | HMDB0000130 | 780    | C00544 |
| <b>Homovanillic acid</b>               | Aromatic compounds-Vitamins-Amines | HMDB0000118 | 1738   | C05582 |
| <b>Hypoxanthine</b>                    | Aromatic compounds-Vitamins-Amines | HMDB0000157 | 790    | C00262 |
| <b>Indoleacetic acid</b>               | Aromatic compounds-Vitamins-Amines | HMDB0000197 | 802    | C00954 |
| <b>Indoxyl sulfate</b>                 | Aromatic compounds-Vitamins-Amines | HMDB0000682 | 10258  |        |
| <b>Lumichrome</b>                      | Aromatic compounds-Vitamins-Amines | METPA0216   |        | C01727 |
| <b>N-Acetylserotonin</b>               | Aromatic compounds-Vitamins-Amines | HMDB0001238 | 903    | C00978 |
| <b>N,N-Dimethylphenethylamine</b>      | Aromatic compounds-Vitamins-Amines | HMDB0032243 | 86536  |        |
| <b>Ortho-Hydroxyphenylacetic acid</b>  | Aromatic compounds-Vitamins-Amines | HMDB0000669 | 11970  | C05852 |
| <b>p-Hydroxyphenylacetic acid</b>      | Aromatic compounds-Vitamins-Amines | HMDB0000020 | 127    | C00642 |
| <b>Paraxanthine</b>                    | Aromatic compounds-Vitamins-Amines | HMDB0001860 | 4687   | C13747 |
| <b>Protocatechuic acid</b>             | Aromatic compounds-Vitamins-Amines | HMDB0001856 | 72     | C00230 |
| <b>Pyrocatechol</b>                    | Aromatic compounds-Vitamins-Amines | HMDB0000957 | 3390   | C15571 |

|                                        |                                                |             |          |        |
|----------------------------------------|------------------------------------------------|-------------|----------|--------|
| <b>trans-Cinnamic acid</b>             | Aromatic compounds-Vitamins-Amines             | HMDB0000930 | 444539   | C10438 |
| <b>Trigonelline</b>                    | Aromatic compounds-Vitamins-Amines             | HMDB0000875 | 5570     | C01004 |
| <b>Uracil</b>                          | Aromatic compounds-Vitamins-Amines             | HMDB0000300 | 1174     | C00106 |
| <b>Uric acid</b>                       | Aromatic compounds-Vitamins-Amines             | HMDB0000289 | 1175     | C00366 |
| <b>Urocanic acid</b>                   | Aromatic compounds-Vitamins-Amines             | HMDB0000301 | 736715   | C00785 |
| <b>Xanthine</b>                        | Aromatic compounds-Vitamins-Amines             | HMDB0000292 | 1188     | C00385 |
| <b>Thymine</b>                         | Aromatic compounds-Vitamins-Amines             | HMDB0000262 | 1135     | C00178 |
| <b>12-Hydroxydodecanoic acid</b>       | Lipids: Fatty acids-Steroids-Hormones-Vitamins | HMDB0002059 | 79034    | C08317 |
| <b>2-Hydroxybutyric acid</b>           | Lipids: Fatty acids-Steroids-Hormones-Vitamins | HMDB0000008 | 11266    | C05984 |
| <b>4-Trimethylammoniobutanoic acid</b> | Lipids: Fatty acids-Steroids-Hormones-Vitamins | HMDB0001161 | 134      | C01181 |
| <b>Caproic acid</b>                    | Lipids: Fatty acids-Steroids-Hormones-Vitamins | HMDB0000535 | 8892     | C01585 |
| <b>Ethylmalonic acid</b>               | Lipids: Fatty acids-Steroids-Hormones-Vitamins | HMDB0000622 | 11756    |        |
| <b>Galactitol</b>                      | Lipids: Fatty acids-Steroids-Hormones-Vitamins | HMDB0000107 | 11850    | C01697 |
| <b>Glycerophosphocholine</b>           | Lipids: Fatty acids-Steroids-Hormones-Vitamins | HMDB0000086 | 71920    | C00670 |
| <b>Glycocholic acid</b>                | Lipids: Fatty acids-Steroids-Hormones-Vitamins | HMDB0000138 | 23617285 | C01921 |
| <b>Ketoleucine</b>                     | Lipids: Fatty acids-Steroids-Hormones-         | HMDB0000695 | 70       | C00233 |

| Vitamins                               |                                     |             |        |        |  |
|----------------------------------------|-------------------------------------|-------------|--------|--------|--|
| <b>1-Methyladenosine</b>               | Nucleotides-Nucleosides-Derivatives | HMDB0003331 | 27476  | C02494 |  |
| <b>5'-Methylthioadenosine</b>          | Nucleotides-Nucleosides-Derivatives | HMDB0001173 | 439176 | C00170 |  |
| <b>Adenosine</b>                       | Nucleotides-Nucleosides-Derivatives | HMDB0000050 | 60961  | C00212 |  |
| <b>Deoxycytidine</b>                   | Nucleotides-Nucleosides-Derivatives | HMDB0000014 | 13711  | C00881 |  |
| <b>Deoxyguanosine</b>                  | Nucleotides-Nucleosides-Derivatives | HMDB0000085 | 187790 | C00330 |  |
| <b>Guanosine</b>                       | Nucleotides-Nucleosides-Derivatives | HMDB0000133 | 6802   | C00387 |  |
| <b>Inosine</b>                         | Nucleotides-Nucleosides-Derivatives | HMDB0000195 | 6021   | C00294 |  |
| <b>N6-(delta2-Isopentenyl)-adenine</b> | Nucleotides-Nucleosides-Derivatives | METPA1684   |        | C04083 |  |
| <b>Thymidine</b>                       | Nucleotides-Nucleosides-Derivatives | HMDB0000273 | 5789   | C00214 |  |
| <b>Uridine</b>                         | Nucleotides-Nucleosides-Derivatives | HMDB0000296 | 6029   | C00299 |  |
| <b>3-Hydroxycapric acid</b>            | Organic acids                       | HMDB0002203 | 26612  |        |  |
| <b>4-Acetamidobutanoic acid</b>        | Organic acids                       | HMDB0003681 | 18189  | C02946 |  |
| <b>Acetic acid</b>                     | Organic acids                       | HMDB0000042 | 176    | C00033 |  |
| <b>Azelaic acid</b>                    | Organic acids                       | HMDB0000784 | 2266   | C08261 |  |
| <b>Citramalic acid</b>                 | Organic acids                       | HMDB0000426 | 441696 | C00815 |  |
| <b>Formic acid</b>                     | Organic acids                       | HMDB0000142 | 284    | C00058 |  |
| <b>L-Lactic acid</b>                   | Organic acids                       | HMDB0000190 | 61503  | C00186 |  |
| <b>L-Malic acid</b>                    | Organic acids                       | HMDB0000156 | 222656 | C00149 |  |
| <b>N-Acetylputrescine</b>              | Organic acids                       | HMDB0002064 | 122356 | C02714 |  |
| <b>Suberic acid</b>                    | Organic acids                       | HMDB0000893 | 10457  | C08278 |  |

|                                      |               |             |        |        |
|--------------------------------------|---------------|-------------|--------|--------|
| <b>Succinic acid</b>                 | Organic acids | HMDB0000254 | 1110   | C00042 |
| <b>Taurine</b>                       | Organic acids | HMDB0000251 | 1123   | C00245 |
| <b>2-Deoxy-D-Glucose</b>             | Sugars        |             | 3865   | C00586 |
| <b>Alpha-D-Glucose</b>               | Sugars        | HMDB0003345 | 79025  | C00267 |
| <b>D-Galactosamine</b>               | Sugars        | METPA0263   |        | C02262 |
| <b>D-Mannose</b>                     | Sugars        | HMDB0000169 | 18950  | C00936 |
| <b>Gluconic acid</b>                 | Sugars        | HMDB0000625 | 10690  | C00257 |
| <b>Glyceric acid</b>                 | Sugars        | HMDB0000139 | 439194 | C00258 |
| <b>L-Arabitol</b>                    | Sugars        | HMDB0001851 | 94154  | C00532 |
| <b>Methyl beta-D-glucopyranoside</b> | Sugars        | HMDB0029965 | 94214  |        |
| <b>myo-Inositol</b>                  | Sugars        | HMDB0000211 |        | C00137 |
| <b>N-Acetylneuraminate</b>           | Sugars        |             | 3568   | C00270 |
| <b>Ribitol</b>                       | Sugars        | HMDB0000508 |        | C00474 |

| Feces                  |                                        |             |         |        |
|------------------------|----------------------------------------|-------------|---------|--------|
| Metabolite             | Chemical class                         | HMDB        | PubChem | KEGG   |
| Ciliatine              | Acides phosphoriques                   | HMDB0011747 | 339     | C03557 |
| 3-Dehydroshikimate     | Aliphatic compounds cyclic and acyclic | METPA0312   |         | C02637 |
| Acetoin                | Aliphatic compounds cyclic and acyclic | HMDB0003243 | 4068    | C00466 |
| Agmatine               | Aliphatic compounds cyclic and acyclic | HMDB0001432 | 199     | C00179 |
| Cadaverine             | Aliphatic compounds cyclic and acyclic | HMDB0002322 | 273     | C01672 |
| Quinic acid            | Aliphatic compounds cyclic and acyclic | HMDB0003072 | 6508    | C00296 |
| Valerolactone          | Aliphatic compounds cyclic and acyclic | NA          | 10953   | C02240 |
| Shikimic acid          | Aliphatic compounds cyclic and acyclic | HMDB0003070 | 8742    | C00493 |
| Spermidine             | Aliphatic compounds cyclic and acyclic | HMDB0001257 | 1102    | C00315 |
| 3-Sulfinioalanine      | Amino acids-Peptides-Derivatives       | HMDB0000996 | 439270  | C00606 |
| L-Alanine              | Amino acids-Peptides-Derivatives       | HMDB0000161 | 5950    | C00041 |
| L-Cystathionine        | Amino acids-Peptides-Derivatives       | HMDB0000099 | 439258  | C02291 |
| N-Formylglycine        | Amino acids-Peptides-Derivatives       |             | 75606   |        |
| Picolinic acid         | Amino acids-Peptides-Derivatives       | HMDB0002243 | 1018    | C10164 |
| Quinaldic acid         | Amino acids-Peptides-Derivatives       | HMDB0000842 | 7124    | C06325 |
| 5-Hydroxy-L-tryptophan | Amino acids-Peptides-Derivatives       | HMDB0000472 | 144     | C00643 |
| L-Dopa                 | Amino acids-Peptides-Derivatives       | HMDB0000181 | 6047    | C00355 |
| DL-O-Phosphoserine     | Amino acids-Peptides-Derivatives       | HMDB0001721 | 106     | C01005 |

|                                    |                                    |             |        |        |
|------------------------------------|------------------------------------|-------------|--------|--------|
| <b>Homocysteine</b>                | Amino acids-Peptides-Derivatives   | HMDB0000742 | 778    | C00155 |
| <b>S-Adenosylhomocysteine</b>      | Amino acids-Peptides-Derivatives   | HMDB0000939 | 439155 | C00021 |
| <b>2-Aminoisobutyric acid</b>      | Amino acids-Peptides-Derivatives   | HMDB0001906 | 6119   | C03665 |
| <b>3-Methoxytyrosine</b>           | Amino acids-Peptides-Derivatives   | HMDB0001434 | 1670   |        |
| <b>Diaminopimelic acid</b>         | Amino acids-Peptides-Derivatives   | HMDB0001370 | 99290  | C00666 |
| <b>3-Nitrotyrosine</b>             | Amino acids-Peptides-Derivatives   | HMDB0001904 | 65124  |        |
| <b>Cysteic acid</b>                | Amino acids-Peptides-Derivatives   | HMDB0002757 | 25701  | C00506 |
| <b>Hydroxykynurenine</b>           | Amino acids-Peptides-Derivatives   | HMDB0000732 | 89     | C02794 |
| <b>2-Hydroxyphenethylamine</b>     | Aromatic compounds-Vitamins-Amines | HMDB0001065 | 1000   | C02735 |
| <b>3-Methoxytyramine</b>           | Aromatic compounds-Vitamins-Amines | HMDB0000022 | 1669   | C05587 |
| <b>4-Hydroxyphenylpyruvic acid</b> | Aromatic compounds-Vitamins-Amines | HMDB0000707 | 979    | C01179 |
| <b>Dihydrouracil</b>               | Aromatic compounds-Vitamins-Amines | HMDB0000076 | 649    | C00429 |
| <b>Isovaleric acid</b>             | Aromatic compounds-Vitamins-Amines | HMDB0000718 | 10430  | C08262 |
| <b>L-Histidinol</b>                | Aromatic compounds-Vitamins-Amines | HMDB0003431 | 165271 | C00860 |
| <b>p-Aminobenzoic acid</b>         | Aromatic compounds-Vitamins-Amines | HMDB0001392 | 978    | C00568 |
| <b>Purine</b>                      | Aromatic compounds-Vitamins-Amines | HMDB0001366 | 1044   | C15587 |
| <b>Pyridoxine</b>                  | Aromatic compounds-Vitamins-Amines | HMDB0000239 | 1054   | C00314 |
| <b>Resorcinol monoacetate</b>      | Aromatic compounds-Vitamins-Amines |             | 5055   | D02393 |
| <b>Tyramine</b>                    | Aromatic compounds-Vitamins-Amines | HMDB0000306 | 5610   | C00483 |
| <b>Uracil-5-carboxylic acid</b>    | Aromatic compounds-Vitamins-Amines |             | 90301  | C03030 |
| <b>Vanillylmandelic acid</b>       | Aromatic compounds-Vitamins-Amines | HMDB0000291 | 736172 | C05584 |

|                                      |                                                |             |         |        |
|--------------------------------------|------------------------------------------------|-------------|---------|--------|
| <b>2,6-Dihydroxypyridine</b>         | Aromatic compounds-Vitamins-Amines             | METPA0354   |         | C03056 |
| <b>3-Hydroxybenzaldehyde</b>         | Aromatic compounds-Vitamins-Amines             |             | 101     | C03067 |
| <b>5-Methylcytosine</b>              | Aromatic compounds-Vitamins-Amines             | HMDB0002894 | 65040   | C02376 |
| <b>Biliverdin</b>                    | Aromatic compounds-Vitamins-Amines             | HMDB0001008 | 5353439 | C00500 |
| <b>Norepinephrine</b>                | Aromatic compounds-Vitamins-Amines             | HMDB0000216 | 439260  | C00547 |
| <b>4-Hydroxybenzoic acid</b>         | Aromatic compounds-Vitamins-Amines             | HMDB0000500 | 135     | C00156 |
| <b>Benzoic acid</b>                  | Aromatic compounds-Vitamins-Amines             | HMDB0001870 | 243     | C00539 |
| <b>3-Amino-4-hydroxybenzoic acid</b> | Aromatic compounds-Vitamins-Amines             |             | 65083   | C12115 |
| <b>3-Amino-5-hydroxybenzoic acid</b> | Aromatic compounds-Vitamins-Amines             |             | 127115  | C12107 |
| <b>3-Hydroxyanthranilic acid</b>     | Aromatic compounds-Vitamins-Amines             | HMDB0001476 | 86      | C00632 |
| <b>3,4-Dihydroxymandelic acid</b>    | Aromatic compounds-Vitamins-Amines             |             | 85782   | C05580 |
| <b>Ethyl-3-indole acetate</b>        | Aromatic compounds-Vitamins-Amines             |             |         | C00954 |
| <b>Hydroquinone</b>                  | Aromatic compounds-Vitamins-Amines             | HMDB0002434 | 785     | C00530 |
| <b>Vanylglycol</b>                   | Aromatic compounds-Vitamins-Amines             | HMDB0001490 | 10805   | C05594 |
| <b>1H-Indole-3-acetamide</b>         | Aromatic compounds-Vitamins-Amines             | HMDB0029739 | 397     | C02693 |
| <b>Dimethylbenzimidazole</b>         | Aromatic compounds-Vitamins-Amines             | HMDB0003701 | 675     | C03114 |
| <b>Indoleacetaldehyde</b>            | Aromatic compounds-Vitamins-Amines             | HMDB0001190 | 800     | C00637 |
| <b>1-Naphthylamine</b>               | Aromatic compounds-Vitamins-Amines             | METPA1135   |         | C14790 |
| <b>5-Hydroxymethyluracil</b>         | Aromatic compounds-Vitamins-Amines             | HMDB0000469 | 78168   | C03088 |
| <b>Serotonin</b>                     | Aromatic compounds-Vitamins-Amines             | HMDB0000259 | 5202    | C00780 |
| <b>Caprylic acid</b>                 | Lipids: Fatty acids-Steroids-Hormones-Vitamins | HMDB0000482 | 379     | C06423 |

|                                    |                                                |             |          |        |
|------------------------------------|------------------------------------------------|-------------|----------|--------|
| <b>Ergocalciferol</b>              | Lipids: Fatty acids-Steroids-Hormones-Vitamins | HMDB0000900 | 5280793  | C05441 |
| <b>Lithocholic Acid</b>            | Lipids: Fatty acids-Steroids-Hormones-Vitamins | HMDB0000761 | 11740284 | C03990 |
| <b>Maleic acid</b>                 | Lipids: Fatty acids-Steroids-Hormones-Vitamins | HMDB0000176 | 444972   | C01384 |
| <b>Mono-methylglutarate</b>        | Lipids: Fatty acids-Steroids-Hormones-Vitamins |             | 6993194  |        |
| <b>Oleic acid</b>                  | Lipids: Fatty acids-Steroids-Hormones-Vitamins | HMDB0000207 | 445639   | C00712 |
| <b>Rosmarinic acid</b>             | Lipids: Fatty acids-Steroids-Hormones-Vitamins | HMDB0003572 | 5281792  | C01850 |
| <b>Sphinganine</b>                 | Lipids: Fatty acids-Steroids-Hormones-Vitamins | HMDB0000269 | 91486    | C00836 |
| <b>Vitamin A</b>                   | Lipids: Fatty acids-Steroids-Hormones-Vitamins | HMDB0000305 | 445354   | C17276 |
| <b>Petroselinic acid</b>           | Lipids: Fatty acids-Steroids-Hormones-Vitamins | HMDB0002080 | 5461010  | C08363 |
| <b>All-trans-retinoic acid</b>     | Lipids: Fatty acids-Steroids-Hormones-Vitamins | HMDB0001852 | 444795   | C00777 |
| <b>Chenodeoxycholic acid</b>       | Lipids: Fatty acids-Steroids-Hormones-Vitamins | HMDB0000518 | 10133    | C02528 |
| <b>Cholesteryl acetate</b>         | Lipids: Fatty acids-Steroids-Hormones-Vitamins | HMDB0003822 | 6427285  | C02530 |
| <b>2-Methylglutaric acid</b>       | Lipids: Fatty acids-Steroids-Hormones-Vitamins | HMDB0000422 | 12046    |        |
| <b>7-Dehydrocholesterol</b>        | Lipids: Fatty acids-Steroids-Hormones-Vitamins | HMDB0000032 | 439423   | C01164 |
| <b>Glycerol</b>                    | Lipids: Fatty acids-Steroids-Hormones-Vitamins | HMDB0000131 | 753      | C00116 |
| <b>Alpha-Tocopherol</b>            | Lipids: Fatty acids-Steroids-Hormones-Vitamins | HMDB0001893 | 14985    | C02477 |
| <b>Elaidic acid</b>                | Lipids: Fatty acids-Steroids-Hormones-Vitamins | HMDB0000573 | 637517   | C01712 |
| <b>Cortexolone</b>                 | Lipids: Fatty acids-Steroids-Hormones-Vitamins | HMDB0000015 | 53477676 | C05488 |
| <b>Deoxycorticosterone acetate</b> | Lipids: Fatty acids-Steroids-Hormones-Vitamins |             | 5952     | C14554 |
| <b>Valeric acid</b>                | Lipids: Fatty acids-Steroids-Hormones-Vitamins | HMDB0000892 | 7991     | C00803 |
| <b>5'-Deoxyadenosine</b>           | Nucleotides-Nucleosides-Derivatives            | HMDB0001983 | 439182   | C05198 |

|                                               |                                     |             |          |        |
|-----------------------------------------------|-------------------------------------|-------------|----------|--------|
| <b>dCMP</b>                                   | Nucleotides-Nucleosides-Derivatives | HMDB0001202 | 13945    | C00239 |
| <b>Cytidine2',3'-cyclicphosphate</b>          | Nucleotides-Nucleosides-Derivatives |             | 5401     | C02354 |
| <b>5'UMP</b>                                  | Nucleotides-Nucleosides-Derivatives |             | 3405     | C00105 |
| <b>Cytidine</b>                               | Nucleotides-Nucleosides-Derivatives | HMDB0000089 | 6253     | C00475 |
| <b>Cyclic GMP</b>                             | Nucleotides-Nucleosides-Derivatives | HMDB0001314 | 24316    | C00942 |
| <b>Deoxyuridine</b>                           | Nucleotides-Nucleosides-Derivatives | HMDB0000012 | 13712    | C00526 |
| <b>Dimethylsulfone</b>                        | Organic acids                       | HMDB0004983 | 6213     | C11142 |
| <b>Malonic acid</b>                           | Organic acids                       | HMDB0000691 | 867      | C04025 |
| <b>Pimelic acid</b>                           | Organic acids                       | HMDB0000857 | 385      | C02656 |
| <b>4-Heptenal diethyl acetal</b>              | Organic acids                       | HMDB0032306 | 97750    | C04067 |
| <b>Isobutyric acid</b>                        | Organic acids                       | HMDB0001873 | 6590     | C02632 |
| <b>D-Maltose</b>                              | Sugars                              | HMDB0000163 | 10991489 | C00208 |
| <b>Rhamnose</b>                               | Sugars                              | HMDB0000849 | 25310    | C00507 |
| <b>D-Lyxose</b>                               | Sugars                              |             | 3759     | C00476 |
| <b>2-Acetamido-2-deoxy-beta-glucosylamine</b> | Sugars                              |             |          |        |
| <b>Glucosamine</b>                            | Sugars                              | HMDB0001514 | 439213   | C00329 |
| <b>D-Ribose</b>                               | Sugars                              | HMDB0000283 | 5779     | C00121 |
| <b>2-Amino-2-deoxy-D-gluconate</b>            | Sugars                              | METPA0433   |          | C03752 |

| Feces Plasma                |                                        |             |         |        |
|-----------------------------|----------------------------------------|-------------|---------|--------|
| Metabolite                  | Chemical Class                         | HMDB        | PubChem | KEGG   |
| Diethanolamine              | Aliphatic compounds cyclic and acyclic | HMDB0004437 | 8113    | C06772 |
| Putrescine                  | Aliphatic compounds cyclic and acyclic | HMDB0001414 | 1045    | C00134 |
| 4-Guanidinobutanoic acid    | Amino acids-Peptides-Derivatives       | HMDB0003464 | 500     | C01035 |
| 5-Aminopentanoic acid       | Amino acids-Peptides-Derivatives       | HMDB0003355 | 138     | C00431 |
| Aminoadipic acid            | Amino acids-Peptides-Derivatives       | HMDB0000510 | 469     | C00956 |
| Carnosine                   | Amino acids-Peptides-Derivatives       | HMDB0000033 | 439224  | C00386 |
| L-Norvaline                 | Amino acids-Peptides-Derivatives       |             | 4949    | C01826 |
| N-Acetyl-L-aspartic acid    | Amino acids-Peptides-Derivatives       | HMDB0000812 | 65065   | C01042 |
| N-Acetylglutamic acid       | Amino acids-Peptides-Derivatives       | HMDB0001138 | 185     | C00624 |
| N-Alpha-acetyllysine        | Amino acids-Peptides-Derivatives       | HMDB0000446 | 192590  | C12989 |
| 2',4'-Dihydroxyacetophenone | Aromatic compounds-Vitamins-Amines     | HMDB0029659 | 6990    | C03663 |
| 2-Aminobenzoic acid         | Aromatic compounds-Vitamins-Amines     | HMDB0001123 | 227     | C00108 |
| 3-Hydroxybenzoic acid       | Aromatic compounds-Vitamins-Amines     | HMDB0002466 | 7420    | C00587 |
| Caffeic acid                | Aromatic compounds-Vitamins-Amines     | HMDB0001964 | 1549111 | C01481 |
| Histamine                   | Aromatic compounds-Vitamins-Amines     | HMDB0000870 | 774     | C00388 |
| Hydroxyphenyllactic acid    | Aromatic compounds-Vitamins-Amines     | HMDB0000755 | 9378    | C03672 |
| Indole-3-methyl acetate     | Aromatic compounds-Vitamins-Amines     | HMDB0029738 | 74706   |        |

|                                               |                                                |             |         |        |
|-----------------------------------------------|------------------------------------------------|-------------|---------|--------|
| <b>Phenylacetaldehyde</b>                     | Aromatic compounds-Vitamins-Amines             | HMDB0006236 | 998     | C00601 |
| <b>Pyridoxamine</b>                           | Aromatic compounds-Vitamins-Amines             | HMDB0001431 | 1052    | C00534 |
| <b>Salicylamide</b>                           | Aromatic compounds-Vitamins-Amines             | HMDB0015687 | 5147    | NA     |
| <b>Tryptamine</b>                             | Aromatic compounds-Vitamins-Amines             | HMDB0000303 | 1150    | C00398 |
| <b>17a-Estradiol</b>                          | Lipids: Fatty acids-Steroids-Hormones-Vitamins | HMDB0000429 | 68570   | C02537 |
| <b>2,3-Dihydroxypropyl tetradecanoate</b>     | Lipids: Fatty acids-Steroids-Hormones-Vitamins |             | 79050   |        |
| <b>21-Tetrahydroxy-5-alpha-pregnan-20-one</b> | Lipids: Fatty acids-Steroids-Hormones-Vitamins |             | 5864    |        |
| <b>3-Methylglutaric acid</b>                  | Lipids: Fatty acids-Steroids-Hormones-Vitamins | HMDB0000752 | 12284   |        |
| <b>Butyric acid</b>                           | Lipids: Fatty acids-Steroids-Hormones-Vitamins | HMDB0000039 | 264     | C00246 |
| <b>Cortisone</b>                              | Lipids: Fatty acids-Steroids-Hormones-Vitamins | HMDB0002802 | 225609  | C00762 |
| <b>Deoxycholic acid</b>                       | Lipids: Fatty acids-Steroids-Hormones-Vitamins | HMDB0000626 | 222528  | C04483 |
| <b>Dihydroxy-beta-cholanate</b>               | Lipids: Fatty acids-Steroids-Hormones-Vitamins |             |         |        |
| <b>Gamma-Linolenic acid</b>                   | Lipids: Fatty acids-Steroids-Hormones-Vitamins | HMDB0003073 | 5280933 | C06426 |
| <b>Glycerol monoacetate</b>                   | Lipids: Fatty acids-Steroids-Hormones-Vitamins |             | 33510   |        |
| <b>Leukotriene B4</b>                         | Lipids: Fatty acids-Steroids-Hormones-Vitamins | HMDB0001085 | 5283128 | C02165 |
| <b>Deoxyadenosine</b>                         | Nucleotides-Nucleosides-Derivatives            | HMDB0000101 | 13730   | C00559 |
| <b>Adipic acid</b>                            | Organic acids                                  | HMDB0000448 | 196     | C06104 |
| <b>Isocitric acid</b>                         | Organic acids                                  | HMDB0000193 | 1198    | C00311 |
| <b>Propionic acid</b>                         | Organic acids                                  | HMDB0000237 | 1032    | C00163 |
| <b>D-Glucuronic acid</b>                      | Sugars                                         | HMDB0000127 | 94715   | C00191 |

# List of metabolites according to the platform

Table S5: Metabolites detected by platform in plasma, milk and feces. In bold the platform where the metabolite was annotated with the lowest CV (best reproducibility)

| Plasma<br>(Blood :MeOH : CHCl <sub>3</sub> 1 :1 :1) |                     |
|-----------------------------------------------------|---------------------|
| Metabolite                                          | Analytical platform |
| 3-Hydroxycapric acid                                | RP+                 |
| 1-hydroxy-2-naphthoate                              | HILIC-              |
| 1-Methyladenosine                                   | RP- <b>HILIC+</b>   |
| Glycerol monoacetate                                | HILIC+              |
| 2',4'-Dihydroxyacetophenone                         | RP+                 |
| 2,4-Dihydroxypyrimidine-5-carboxylic acid           | HILIC-              |
| Gentisic acid                                       | HILIC-              |
| 2-Aminophenol                                       | HILIC+              |
| Deoxyadenosine                                      | NMR                 |
| 2-Deoxy-D-Glucose                                   | RP+                 |
| Deoxyguanosine                                      | HILIC-              |
| 2-Hydroxybutyric acid                               | RP- <b>NMR</b>      |
| Ortho-Hydroxyphenylacetic acid                      | HILIC-              |
| Ketoleucine                                         | RP- <b>NMR</b>      |

|                                        |                   |
|----------------------------------------|-------------------|
| Protocatechuic acid                    | HILIC-            |
| 3,4-Dihydroxybenzeneacetic acid        | HILIC-            |
| 3-(2-Hydroxyphenyl)propanoic acid      | <b>RP- HILIC-</b> |
| Hydroxyphenyllactic acid               | HILIC-            |
| 21-Tetrahydroxy-5-alpha-pregnan-20-one | HILIC-            |
| Dihydroxy-beta-cholante                | HILIC-            |
| 3-Hydroxymethylglutaric acid           | HILIC-            |
| 3-Hydroxybenzoic acid                  | HILIC-            |
| 3-Hydroxybutyric acid                  | NMR               |
| (S)-3-Hydroxyisobutyric acid           | <b>HILIC- NMR</b> |
| 3-Hydroxyphenylacetic acid             | HILIC-            |
| 3-Methylglutaric acid                  | RP-               |
| 3-Methyldioxyindole                    | RP-               |
| Ureidopropionic acid                   | RP-               |
| 4-Acetamidobutanoic acid               | RP-               |
| Gamma-Aminobutyric acid                | RP+               |
| 4-Hydroxycinnamic acid                 | HILIC+            |
| 4-Guanidinobutanoic acid               | RP+               |
| 4-Hydroxy-L-proline                    | RP+               |
| p-Hydroxyphenylacetic acid             | HILIC-            |
| 5-Aminolevulinic acid                  | RP+               |
| 5-Aminopentanoic acid                  | RP+               |

|                            |                       |
|----------------------------|-----------------------|
| 5-Hydroxyindoleacetic acid | <b>RP+ HILIC-</b>     |
| 5'-Methylthioadenosine     | <b>RP+ HILIC+</b>     |
| Pyroglutamic acid          | RP+                   |
| Acetic acid                | NMR                   |
| Acetoacetic acid           | HILIC-                |
| Acetone                    | NMR                   |
| N-Acetyl-L-alanine         | RP+                   |
| N-Acetyl-L-aspartic acid   | HILIC+                |
| N-Acetylglutamic acid      | RP+                   |
| Acetylglycine              | RP-                   |
| N-Acetylleucine            | RP+                   |
| N-Acetylneuraminate        | RP-                   |
| N-Acetyl-L-phenylalanine   | <b>RP- HILIC-</b>     |
| N-Acetylputrescine         | HILIC+                |
| N-Acetylserine             | RP-                   |
| N-Acetylserotonin          | HILIC+                |
| N-acetyltryptophan         | RP-                   |
| Adenine                    | RP+                   |
| Adenosine                  | HILIC-                |
| Adipic acid                | RP+                   |
| Allantoin                  | <b>RP- HILIC+ NMR</b> |
| Allose                     | HILIC-                |

|                     |                       |
|---------------------|-----------------------|
| Alpha-D-Glucose     | RP- HILIC- <b>NMR</b> |
| Aminoadipic acid    | RP-                   |
| 2-Aminobenzoic acid | HILIC+                |
| L-Arabitol          | HILIC-                |
| L-Arginine          | RP-                   |
| L-Asparagine        | <b>RP-</b> HILIC+     |
| L-Aspartic acid     | RP-                   |
| Azelaic acid        | RP-                   |
| Benzyl alcohol      | RP- <b>HILIC-</b>     |
| Beta-Alanine        | RP+ <b>NMR</b>        |
| Betaine             | RP+                   |
| Bilirubin           | HILIC+                |
| Biotin              | RP+                   |
| Butyric acid        | NMR                   |
| Caffeic acid        | HILIC-                |
| L-Carnitine         | RP+                   |
| Carnosine           | RP- <b>NMR</b>        |
| Pyrocatechol        | RP-                   |
| Choline             | NMR                   |
| trans-Cinnamic acid | RP+ <b>HILIC-</b>     |
| Citramalic acid     | RP-                   |
| Citric acid         | NMR                   |

|                                 |                |
|---------------------------------|----------------|
| Citrulline                      | RP-            |
| Cortisone                       | HILIC-         |
| Creatine                        | <b>RP- NMR</b> |
| Creatinine                      | NMR            |
| Cyclohexane-1,2-Diol            | HILIC+         |
| L-Cystine                       | RP-            |
| Cytosine                        | RP+            |
| 4-Trimethylammoniobutanoic acid | RP+            |
| Deoxycholic acid                | HILIC-         |
| Deoxycytidine                   | HILIC-         |
| Diethanolamine                  | HILIC+         |
| Dihydroxyacetone phosphate      | HILIC-         |
| N,N-Dimethylphenethylamine      | HILIC+         |
| Dimethylamine                   | NMR            |
| Dimethylglycine                 | NMR            |
| 17a-Estradiol                   | HILIC+         |
| O-Phosphoethanolamine           | RP-            |
| Ethylmalonic acid               | RP-            |
| Formic acid                     | NMR            |
| Formyl-L-methionylpeptide       | RP-            |
| Galactitol                      | HILIC-         |
| D-Galactosamine                 | RP+            |

|                         |                              |
|-------------------------|------------------------------|
| D-Galactose             | HILIC-                       |
| D-Glucuronic acid       | RP-                          |
| L-Glutamic acid         | RP-                          |
| L-Glutamine             | RP+                          |
| Glyceric acid           | RP-                          |
| Glycerophosphocholine   | RP+                          |
| Glycine                 | RP+ <b>NMR</b>               |
| Glycocholic acid        | RP-                          |
| Glycolaldehyde dimer    | HILIC+                       |
| Guanidoacetic acid      | RP+ <b>HILIC+</b>            |
| Guanine                 | HILIC-                       |
| Guanosine               | HILIC+                       |
| Guanosine monophosphate | RP+                          |
| Caproic acid            | HILIC+                       |
| Hippuric acid           | RP- <b>HILIC-</b> <b>NMR</b> |
| Histamine               | HILIC+                       |
| L-Histidine             | RP- <b>NMR</b>               |
| Homogentisic acid       | HILIC-                       |
| L-Homoserine            | RP-                          |
| Homovanillic acid       | HILIC-                       |
| Hypoxanthine            | RP-                          |
| Indoleacetic acid       | <b>RP+</b> HILIC-            |

|                                 |                   |
|---------------------------------|-------------------|
| Indoxyl sulfate                 | <b>RP- HILIC-</b> |
| Inosine                         | <b>RP+ HILIC+</b> |
| Isocitric acid                  | <b>RP-</b>        |
| L-Isoleucine                    | <b>NMR</b>        |
| N6-(delta2-Isopentenyl)-adenine | <b>RP-</b>        |
| L-Kynurenine                    | <b>RP+</b>        |
| L-Lactic acid                   | <b>RP- NMR</b>    |
| Alpha-Lactose                   | <b>NMR</b>        |
| L-Leucine                       | <b>NMR</b>        |
| L-Norleucine                    | <b>RP+</b>        |
| Leukotriene B4                  | <b>RP+</b>        |
| Gamma-Linolenic acid            | <b>HILIC+</b>     |
| Lumichrome                      | <b>RP+ HILIC+</b> |
| L-Lysine                        | <b>RP+ NMR</b>    |
| L-Malic acid                    | <b>RP-</b>        |
| D-Mannose                       | <b>HILIC+ NMR</b> |
| L-Methionine                    | <b>RP- NMR</b>    |
| Methyl beta-D-glucopyranoside   | <b>HILIC-</b>     |
| Indole-3-methyl acetate         | <b>RP+ HILIC+</b> |
| Methyl jasmonate                | <b>HILIC+</b>     |
| Methylguanidine                 | <b>HILIC+</b>     |
| 3-Methylhistidine               | <b>NMR</b>        |

|                           |                   |
|---------------------------|-------------------|
| Methylmalonic acid        | HILIC-            |
| myo-Inositol              | HILIC-            |
| N-Alpha-acetyllysine      | RP+               |
| L-Norvaline               | RP+               |
| Acetylcholine             | NMR               |
| 12-Hydroxydodecanoic acid | RP- <b>HILIC-</b> |
| Ornithine                 | RP+               |
| Orotic acid               | HILIC-            |
| Pantothenic acid          | HILIC+            |
| Paraxanthine              | RP+ <b>HILIC+</b> |
| Phenylacetaldehyde        | HILIC-            |
| Phenylacetic acid         | HILIC-            |
| L-Phenylalanine           | RP+ <b>HILIC+</b> |
| Phenylpyruvic acid        | HILIC+            |
| Phosphorylcholine         | NMR               |
| Pipecolic acid            | RP- <b>HILIC+</b> |
| L-Proline                 | RP+               |
| Propanal                  | HILIC+            |
| Propionic acid            | NMR               |
| Putrescine                | RP+               |
| Pyridoxamine              | RP+               |
| Pyruvic acid              | NMR               |

|                                    |                       |
|------------------------------------|-----------------------|
| 2,3-Dihydroxypropyl tetradecanoate | RP+ <b>HILIC+</b>     |
| Ribitol                            | HILIC-                |
| Salicylamide                       | HILIC+                |
| Sarcosine                          | NMR                   |
| L-Serine                           | RP+                   |
| Sorbose                            | HILIC-                |
| Suberic acid                       | RP-                   |
| Succinic acid                      | RP-                   |
| Taurine                            | RP-                   |
| Lithocholytaurine                  | HILIC-                |
| Theobromine                        | HILIC+                |
| L-Threonine                        | RP+ <b>NMR</b>        |
| Thymidine                          | <b>HILIC+</b> HILIC-  |
| Thyroxine                          | RP-                   |
| Trigonelline                       | HILIC+                |
| Trimethylamine                     | HILIC+                |
| Tryptamine                         | RP+                   |
| L-Tryptophan                       | <b>RP-</b> HILIC+ NMR |
| L-Tyrosine                         | RP- <b>HILIC+</b> NMR |
| Uracil                             | <b>RP+</b> HILIC+     |
| Uric acid                          | <b>RP+</b> HILIC-     |
| Uridine                            | <b>RP-</b> HILIC+     |

|               |                       |
|---------------|-----------------------|
| Urocanic acid | RP+                   |
| L-Valine      | RP+ <b>HILIC+</b> NMR |
| Xanthine      | <b>RP+</b> HILIC-     |
| Xanthosine    | HILIC-                |

| <b>Milk</b>                                                  |                            |
|--------------------------------------------------------------|----------------------------|
| (Milk :H <sub>2</sub> O :MeOH :CHCl <sub>3</sub> 1 :3 :4 :6) |                            |
| <b>Metabolites</b>                                           | <b>Analytical platform</b> |
| 3-Hydroxycapric acid                                         | <b>RP-</b> HILIC+          |
| 1-Aminocyclopropanecarboxylic acid                           | RP+                        |
| 1-Methyladenosine                                            | HILIC+                     |
| 2,4-Dihydroxypyrimidine-5-carboxylic acid                    | HILIC-                     |
| Gentisic acid                                                | HILIC-                     |
| 2-Aminophenol                                                | HILIC+                     |
| 2-Deoxy-D-Glucose                                            | <b>RP+ HILIC-</b>          |
| Deoxyguanosine                                               | HILIC-                     |
| 2-Hydroxybutyric acid                                        | RP-                        |
| Ortho-Hydroxyphenylacetic acid                               | HILIC-                     |
| 2-Hydroxypyridine                                            | HILIC+                     |
| Citraconic acid                                              | HILIC-                     |
| Oxoglutaric acid                                             | NMR                        |
| Protocatechuic acid                                          | HILIC-                     |

|                                   |                   |
|-----------------------------------|-------------------|
| 3,4-Dihydroxybenzeneacetic acid   | HILIC-            |
| Cyclic AMP                        | HILIC+            |
| 3-(2-Hydroxyphenyl)propanoic acid | <b>RP-</b> HILIC- |
| 3-Aminoisobutanoic acid           | HILIC-            |
| 3-Hydroxymethylglutaric acid      | HILIC-            |
| 3-Hydroxybutyric acid             | NMR               |
| 3-Hydroxyphenylacetic acid        | HILIC-            |
| 3-Methyldioxyindole               | RP+               |
| 3-Methyladenine                   | RP+ <b>HILIC-</b> |
| Ureidopropionic acid              | RP-               |
| 4-Acetamidobutanoic acid          | <b>RP-</b> HILIC+ |
| Gamma-Aminobutyric acid           | <b>RP+</b> HILIC+ |
| Kynurenic acid                    | RP+               |
| 4-Hydroxybenzaldehyde             | HILIC-            |
| Oxfenicine                        | RP+               |
| 4-Hydroxy-L-proline               | <b>RP+</b> HILIC+ |
| p-Hydroxyphenylacetic acid        | <b>RP-</b> HILIC- |
| Imidazoleacetic acid              | HILIC-            |
| Ketoleucine                       | <b>RP-</b> HILIC- |
| 4-Methylcatechol                  | RP-               |
| 5-Aminolevulinic acid             | <b>RP+</b> HILIC+ |
| 5-Hydroxyindoleacetic acid        | HILIC+            |

|                          |                   |
|--------------------------|-------------------|
| 5-Hydroxylysine          | RP+               |
| 5'-Methylthioadenosine   | <b>RP+</b> HILIC+ |
| Pyroglutamic acid        | RP-               |
| L-Fucose                 | HILIC-            |
| Acetamide                | NMR               |
| Acetic acid              | NMR               |
| Acetoacetic acid         | <b>HILIC-</b> NMR |
| N-Acetyl-L-alanine       | RP+               |
| L-Acetylcarnitine        | <b>HILIC+</b> NMR |
| N-Acetylgalactosamine    | HILIC-            |
| N-Acetyl-D-glucosamine   | HILIC+            |
| Acetylglycine            | RP+               |
| N-Acetylleucine          | HILIC-            |
| N-Acetylmannosamine      | RP+ <b>HILIC-</b> |
| N-Acetyl-L-methionine    | RP-               |
| N-Acetylneuraminate      | RP-               |
| N-Acetyl-L-phenylalanine | <b>RP-</b> HILIC- |
| N-Acetylputrescine       | HILIC+            |
| N-Acetylserine           | RP-               |
| N-Acetylserotonin        | HILIC+            |
| N-acetyltryptophan       | RP-               |
| Adenine                  | HILIC+            |

|                         |                       |
|-------------------------|-----------------------|
| Adenosine               | <b>RP+</b> HILIC-     |
| ADP-glucose             | RP-                   |
| Adenosine monophosphate | RP-                   |
| Allantoin               | RP- <b>HILIC+</b>     |
| Allose                  | HILIC-                |
| L-Allothreonine         | HILIC+                |
| Galactose 1-phosphate   | HILIC+                |
| Alpha-D-Glucose         | <b>RP-</b> HILIC- NMR |
| Anserine                | RP+                   |
| L-Arabitol              | RP- <b>HILIC-</b>     |
| L-Arginine              | <b>RP+</b> HILIC-     |
| L-Asparagine            | <b>RP+</b> HILIC-     |
| L-Aspartic acid         | RP-                   |
| Azelaic acid            | RP-                   |
| Benzyl alcohol          | HILIC-                |
| Beta-Alanine            | <b>RP+</b> HILIC+ NMR |
| Betaine                 | <b>RP+</b> HILIC+     |
| Biotin                  | <b>RP-</b> HILIC+     |
| Butanal                 | HILIC+                |
| L-Carnitine             | <b>RP+</b> HILIC+     |
| Pyrocatechol            | RP-                   |
| Cellobiose              | HILIC-                |

|                                 |                       |
|---------------------------------|-----------------------|
| Cholic acid                     | HILIC-                |
| Choline                         | RP+ <b>NMR</b>        |
| trans-Cinnamic acid             | RP+                   |
| Citramalic acid                 | HILIC+                |
| Citric acid                     | NMR                   |
| Citrulline                      | <b>RP-</b> HILIC-     |
| Corticosterone                  | RP+                   |
| Cortisol                        | RP+                   |
| Cortisol-21-acetate             | RP+                   |
| Creatine                        | RP+ HILIC+ <b>NMR</b> |
| Phosphocreatine                 | NMR                   |
| Creatinine                      | <b>RP-</b> HILIC+     |
| Cyclohexane-1,2-Diol            | HILIC+                |
| Cytosine                        | RP+ <b>HILIC+</b>     |
| 4-Trimethylammoniobutanoic acid | <b>RP+</b> HILIC+     |
| Deoxycytidine                   | HILIC+                |
| Dethiobiotin                    | RP+                   |
| Diacetyl                        | HILIC+                |
| L-Dihydroorotic acid            | RP+                   |
| Dimethyl sulfone                | NMR                   |
| N,N-Dimethylphenethylamine      | HILIC+                |
| Dimethylamine                   | NMR                   |

|                                         |                   |
|-----------------------------------------|-------------------|
| Epinephrine                             | RP+               |
| Ethanolamine                            | HILIC+            |
| O-Phosphoethanolamine                   | RP-               |
| Ethylmalonic acid                       | HILIC-            |
| trans-Ferulic acid                      | <b>RP-</b> HILIC+ |
| Formic acid                             | NMR               |
| Formyl-L-methionylpeptide               | RP-               |
| D-Fructose                              | HILIC-            |
| Fumaric acid                            | NMR               |
| Galactaric acid                         | RP-               |
| Galactitol                              | HILIC-            |
| D-Galactosamine                         | RP+               |
| D-Galactose                             | HILIC-            |
| Gluconic acid                           | RP-               |
| Glucosamine 6-phosphate                 | RP-               |
| Glucose 6-phosphate                     | RP-               |
| L-Glutamic acid                         | <b>RP+</b> HILIC- |
| L-Glutamine                             | <b>RP+</b> HILIC+ |
| Glyceraldehyde-3-phosphatediethylacetal | RP+               |
| Glyceric acid                           | RP-               |
| Glycerol 3-phosphate                    | HILIC+            |
| Glycerophosphocholine                   | <b>RP+</b> HILIC+ |

|                                 |                       |
|---------------------------------|-----------------------|
| Glycine                         | <b>RP+</b> HILIC+     |
| Glycocholic acid                | RP-                   |
| Glycolaldehyde dimer            | HILIC+                |
| Guanidoacetic acid              | RP+ <b>HILIC+</b>     |
| Guanine                         | HILIC+                |
| Guanosine                       | <b>RP+</b> HILIC+     |
| Heptanoic acid                  | HILIC+                |
| Caproic acid                    | HILIC+                |
| Hippuric acid                   | <b>RP-</b> HILIC+ NMR |
| L-Histidine                     | RP-                   |
| Homogentisic acid               | HILIC+                |
| L-Homoserine                    | <b>RP-</b> HILIC-     |
| Homovanillic acid               | HILIC-                |
| Hypotaurine                     | HILIC-                |
| Hypoxanthine                    | RP- <b>HILIC+</b>     |
| Indoleacetic acid               | RP+                   |
| Tryptophanol                    | RP+ <b>HILIC-</b>     |
| Indolepyruvate                  | HILIC+                |
| Indoxyl sulfate                 | <b>RP-</b> HILIC-     |
| Inosine                         | <b>RP-</b> HILIC+ NMR |
| L-Isoleucine                    | HILIC+                |
| N6-(delta2-Isopentenyl)-adenine | RP-                   |

|                               |                       |
|-------------------------------|-----------------------|
| L-Kynurenine                  | RP+                   |
| L-Lactic acid                 | RP- HILIC- <b>NMR</b> |
| Alpha-Lactose                 | NMR                   |
| L-Leucine                     | HILIC+                |
| Lumichrome                    | <b>RP+</b> HILIC-     |
| L-Lysine                      | RP+                   |
| L-Malic acid                  | RP-                   |
| Mannitol                      | <b>RP-</b> HILIC-     |
| D-Mannose                     | HILIC+                |
| Melatonin                     | HILIC+                |
| L-Methionine                  | RP-                   |
| Methyl beta-D-glucopyranoside | HILIC-                |
| Methylguanidine               | HILIC+                |
| 3-Methylhistidine             | RP+                   |
| Methylmalonic acid            | RP+                   |
| N-Methyltryptamine            | <b>RP+</b> HILIC+     |
| myo-Inositol                  | RP+ HILIC- <b>NMR</b> |
| N-Trimethyllysine             | <b>RP+</b> HILIC+     |
| Niacinamide                   | <b>RP+</b> HILIC+     |
| Nicotinic acid                | RP-                   |
| L(-)-Nicotine                 | HILIC+                |
| N-Methylhydantoin             | NMR                   |

|                           |                   |
|---------------------------|-------------------|
| L-Norleucine              | HILIC+            |
| Phenylacetyl glycine      | NMR               |
| Acetylcholine             | NMR               |
| 12-Hydroxydodecanoic acid | RP-               |
| Ornithine                 | RP+ <b>HILIC-</b> |
| Orotic acid               | HILIC- <b>NMR</b> |
| Palatinose                | HILIC-            |
| Pantolactone              | HILIC-            |
| Pantothenic acid          | <b>RP-</b> HILIC+ |
| Paraxanthine              | HILIC+            |
| L-Phenylalanine           | <b>RP-</b> HILIC+ |
| Phosphorylcholine         | RP+ <b>NMR</b>    |
| Pipecolic acid            | HILIC+            |
| L-Proline                 | RP+ <b>HILIC+</b> |
| Propanal                  | HILIC+            |
| Pterin                    | RP+               |
| Pyrrole-2-carboxylic acid | HILIC+            |
| Ribitol                   | HILIC-            |
| Riboflavin                | HILIC+            |
| Glucaric acid             | RP-               |
| Salicyluric acid          | HILIC+            |
| Sarcosine                 | HILIC+            |

|                     |                       |
|---------------------|-----------------------|
| L-Serine            | <b>RP- HILIC+</b>     |
| Sorbitol            | HILIC-                |
| L-Sorbose           | HILIC-                |
| Suberic acid        | RP-                   |
| Succinic acid       | RP- HILIC+ <b>NMR</b> |
| Sucrose             | HILIC-                |
| D-Tagatose          | HILIC-                |
| Taurine             | RP- <b>HILIC+</b> NMR |
| Lithocholytaurine   | HILIC-                |
| Theobromine         | HILIC+                |
| Theophylline        | HILIC+                |
| L-Threonine         | <b>RP+</b> HILIC-     |
| Thymidine           | HILIC-                |
| Thymine             | <b>RP+</b> HILIC+     |
| trans-Aconitic acid | RP- <b>HILIC-</b> NMR |
| Trigonelline        | <b>RP+</b> HILIC+     |
| Trimethylamine      | HILIC+                |
| L-Tryptophan        | <b>RP-</b> HILIC+     |
| L-Tyrosine          | <b>RP+</b> HILIC+     |
| Uracil              | <b>RP-</b> HILIC+     |
| Uric acid           | <b>RP+</b> HILIC-     |
| Uridine             | <b>RP-</b> NMR        |

|                                           |                   |
|-------------------------------------------|-------------------|
| Uridine diphosphategalactose              | <b>HILIC- NMR</b> |
| Uridine diphosphate glucose               | <b>HILIC- NMR</b> |
| Uridine diphosphate-N-acetylgalactosamine | <b>HILIC-</b>     |
| Uridine-5-diphospho-n-acetylglucosamine   | <b>HILIC- NMR</b> |
| Urocanic acid                             | <b>RP+ HILIC-</b> |
| L-Valine                                  | <b>RP+</b>        |
| Xanthine                                  | <b>RP- HILIC-</b> |
| D-Xylitol                                 | <b>HILIC-</b>     |

| <b>FECS</b><br>(MeOH : H <sub>2</sub> O 4 :1) |                            |
|-----------------------------------------------|----------------------------|
| <b>Metabolites</b>                            | <b>Analytical platform</b> |
| 3-Hydroxycapric acid                          | <b>RP+</b>                 |
| 1-Aminocyclopropanecarboxylic acid            | <b>RP+ HILIC +</b>         |
| 1-Methyladenosine                             | <b>RP+ HILIC +</b>         |
| 1-Naphthylamine                               | <b>HILIC+</b>              |
| Glyceryl monoacetate                          | <b>HILIC+</b>              |
| 2',4'-Dihydroxyacetophenone                   | <b>HILIC-</b>              |
| 2,4-Dihydroxypyrimidine-5-carboxylic acid     | <b>HILIC-</b>              |
| Gentisic acid                                 | <b>RP- HILIC-</b>          |
| Diaminopimelic acid                           | <b>RP+</b>                 |

|                                        |                   |
|----------------------------------------|-------------------|
| 2,6-Dihydroxypyridine                  | HILIC+            |
| 2-Acetamido-2-deoxy-beta-glucosylamine | <b>RP+</b> HILIC- |
| 2-Aminoisobutyric acid                 | HILIC+            |
| Ciliatine                              | RP-               |
| 2-Aminophenol                          | <b>RP+</b> HILIC- |
| Deoxyadenosine                         | RP- <b>HILIC+</b> |
| dCMP                                   | RP-               |
| 2-Deoxy-D-Glucose                      | <b>RP+</b> HILIC- |
| Deoxyguanosine                         | HILIC-            |
| 2-Hydroxybutyric acid                  | RP-               |
| Ortho-Hydroxyphenylacetic acid         | HILIC- NMR        |
| 2-Hydroxypyridine                      | HILIC+            |
| 2-Methylglutaric acid                  | HILIC-            |
| Citraconic acid                        | HILIC-            |
| Quinaldic acid                         | HILIC-            |
| Protocatechuic acid                    | HILIC-            |
| 3,4-Dihydroxybenzeneacetic acid        | HILIC-            |
| L-Dopa                                 | <b>RP+</b> HILIC+ |
| 3-(2-Hydroxyphenyl)propanoic acid      | <b>RP-</b> HILIC- |
| Hydroxyphenyllactic acid               | RP-               |
| 4-Hydroxyphenylpyruvic acid            | RP+               |

|                                        |                   |
|----------------------------------------|-------------------|
| 21-Tetrahydroxy-5-alpha-pregnan-20-one | <b>RP+ HILIC-</b> |
| Dihydroxy-beta-cholanate               | HILIC-            |
| Lithocholic Acid                       | RP-               |
| 3-Amino-4-hydroxybenzoic acid          | HILIC+            |
| 3-Amino-5-hydroxybenzoic acid          | RP+               |
| 3-Aminoisobutanoic acid                | HILIC-            |
| 3-Dehydroshikimate                     | RP-               |
| 3-Hydroxyanthranilic acid              | <b>RP+ HILIC+</b> |
| 3-Hydroxybenzaldehyde                  | HILIC-            |
| 3-Hydroxybenzoic acid                  | RP- <b>HILIC-</b> |
| Hydroxykynurenine                      | RP+               |
| 3-Hydroxyphenylacetic acid             | <b>RP- HILIC-</b> |
| Vanillylmandelic acid                  | <b>RP- HILIC+</b> |
| 3-Methoxytyrosine                      | HILIC+            |
| 3-Methoxytyramine                      | RP+ <b>HILIC-</b> |
| 3-Methylglutaric acid                  | <b>RP- HILIC-</b> |
| 3-Methyldioxyindole                    | RP- <b>HILIC+</b> |
| 3-Methyladenine                        | RP+ <b>HILIC+</b> |
| 3-Nitrotyrosine                        | RP-               |
| 3-Sulfinioalanine                      | RP-               |
| Ureidopropionic acid                   | <b>RP+ HILIC+</b> |

|                            |                          |
|----------------------------|--------------------------|
| 4-Acetamidobutanoic acid   | HILIC-                   |
| p-Aminobenzoic acid        | HILIC-                   |
| 4-Guanidinobutanoic acid   | <b>RP+</b> HILIC+        |
| Kynurenic acid             | <b>RP+</b> HILIC+        |
| Vanylglycol                | HILIC+                   |
| 4-Hydroxybenzaldehyde      | HILIC-                   |
| 4-Hydroxybenzoic acid      | HILIC-                   |
| Oxfenicine                 | RP+                      |
| 4-Hydroxy-L-proline        | <b>RP+</b> HILIC+        |
| p-Hydroxyphenylacetic acid | <b>RP+</b> HILIC-        |
| Imidazoleacetic acid       | RP+ <b>HILIC+</b>        |
| Ketoleucine                | RP- <b>HILIC-</b>        |
| Dihydrouracil              | <b>RP+</b> HILIC+        |
| 5-Aminolevulinic acid      | RP+                      |
| 5-Aminopentanoic acid      | RP+ <b>HILIC+</b>        |
| 5'-Deoxyadenosine          | HILIC+                   |
| 5-Hydroxyindoleacetic acid | <b>RP+</b> HILIC-        |
| 5-Hydroxylysine            | RP+                      |
| 5-Hydroxymethyluracil      | RP-                      |
| 5-Hydroxy-L-tryptophan     | RP-                      |
| 5-Methylcytosine           | <b>RP+</b> <b>HILIC+</b> |

|                          |                   |
|--------------------------|-------------------|
| 5'-Methylthioadenosine   | RP+ <b>HILIC+</b> |
| Pyroglutamic acid        | RP- <b>HILIC-</b> |
| Valerolactone            | HILIC+            |
| Pimelic acid             | HILIC-            |
| Acetamide                | NMR               |
| Acetic acid              | NMR               |
| Acetoin                  | HILIC-            |
| N-Acetyl-L-alanine       | RP+               |
| N-Acetyl-L-aspartic acid | RP-               |
| L-Acetylcarnitine        | <b>HILIC+</b> NMR |
| N-Acetylgalactosamine    | HILIC-            |
| N-Acetyl-D-glucosamine   | <b>RP-</b> HILIC+ |
| N-Acetylglutamic acid    | RP+               |
| Acetylglycine            | RP-               |
| N-Acetylleucine          | RP+               |
| N-Acetylmannosamine      | <b>RP+ HILIC+</b> |
| N-Acetyl-L-methionine    | RP- <b>HILIC+</b> |
| N-Acetylneuraminate      | RP+               |
| N-Acetyl-L-phenylalanine | RP+ <b>HILIC+</b> |
| N-Acetylputrescine       | RP+ <b>HILIC+</b> |
| N-Acetyserine            | RP+               |

|                        |                          |
|------------------------|--------------------------|
| N-Acetylserotonin      | <b>RP-</b> HILIC+        |
| N-acetyltryptophan     | RP+                      |
| Adenine                | <b>RP+</b> HILIC+        |
| Adenosine              | RP+ <b>HILIC+</b>        |
| Cyclic AMP             | HILIC-                   |
| S-Adenosylhomocysteine | HILIC+                   |
| Adipic acid            | <b>RP-</b> HILIC-        |
| Agmatine               | RP+                      |
| L-Alanine              | HILIC+                   |
| Allantoin              | RP-                      |
| L-Allothreonine        | HILIC+                   |
| Alpha-D-Glucose        | HILIC-                   |
| Alpha-Tocopherol       | HILIC+                   |
| Aminoadipic acid       | <b>RP+</b> HILIC+        |
| Anserine               | HILIC+                   |
| 2-Aminobenzoic acid    | HILIC-                   |
| L-Arabitol             | RP-                      |
| L-Arginine             | <b>RP+</b> <b>HILIC+</b> |
| L-Asparagine           | <b>RP+</b> HILIC-        |
| L-Aspartic acid        | RP+                      |
| Azelaic acid           | <b>RP-</b> HILIC-        |

|                       |                       |
|-----------------------|-----------------------|
| Benzoic acid          | HILIC-                |
| Benzyl alcohol        | HILIC-                |
| Beta-Alanine          | <b>RP+</b> HILIC+ NMR |
| Betaine               | <b>RP+</b> HILIC+ NMR |
| Biliverdin            | HILIC+                |
| Biotin                | RP+ <b>HILIC+</b>     |
| Butyric acid          | HILIC- <b>NMR</b>     |
| Cadaverine            | RP+ <b>HILIC+</b>     |
| Caffeic acid          | RP-                   |
| Caprylic acid         | HILIC-                |
| L-Carnitine           | <b>RP+</b> HILIC+     |
| Carnosine             | RP+ <b>HILIC+</b>     |
| Pyrocatechol          | <b>RP-</b> HILIC-     |
| Chenodeoxycholic acid | HILIC-                |
| Cholic acid           | RP+                   |
| 7-Dehydrocholesterol  | HILIC+                |
| Cholesteryl acetate   | HILIC+                |
| Choline               | RP+ <b>NMR</b>        |
| trans-Cinnamic acid   | <b>RP+</b> HILIC-     |
| Citramalic acid       | <b>RP-</b> HILIC+     |
| Citrulline            | <b>RP+</b> HILIC+     |

|                                |                   |
|--------------------------------|-------------------|
| Corticosterone                 | HILIC+            |
| Cortisol                       | RP+               |
| Cortisol-21-acetate            | RP-               |
| Cortisone                      | HILIC-            |
| Creatine                       | RP+               |
| Creatinine                     | <b>RP+</b> HILIC+ |
| Cyclohexane-1,2-Diol           | HILIC-            |
| L-Cystathionine                | RP-               |
| Cysteic acid                   | <b>RP-</b> HILIC- |
| Cytidine                       | <b>RP+</b> HILIC+ |
| Cytidine2',3'-cyclicphosphate  | RP-               |
| Cytosine                       | RP+ <b>HILIC+</b> |
| 4-Trimethylammonibutanoic acid | <b>RP+</b> HILIC+ |
| Deoxycholic acid               | HILIC-            |
| Deoxycorticosterone acetate    | RP+               |
| Deoxycytidine                  | RP- <b>HILIC+</b> |
| Deoxyuridine                   | HILIC+            |
| Diacetyl                       | HILIC+            |
| Diethanolamine                 | <b>RP+</b> HILIC+ |
| 4-Heptenal diethyl acetal      | HILIC-            |
| L-Dihydroorotic acid           | RP-               |

|                             |                    |
|-----------------------------|--------------------|
| 3,4-Dihydroxymandelicacid   | RP-                |
| N,N-Dimethylphenethylamine  | HILIC - <b>NMR</b> |
| Dimethylbenzimidazole       | RP+                |
| Elaidic acid                | HILIC-             |
| Epinephrine                 | RP+                |
| 17a-Estradiol               | HILIC+             |
| Ethanolamine                | HILIC+             |
| O-Phosphoethanolamine       | RP+                |
| Ethyl-3-indole acetate      | HILIC-             |
| Ethylmalonic acid           | <b>RP-</b> HILIC-  |
| trans-Ferulic acid          | HILIC-             |
| Formic acid                 | NMR                |
| N-Formylglycine             | RP+                |
| Formyl-L-methionylpeptide   | RP+                |
| Fumaric acid                | RP-                |
| Galactitol                  | RP+                |
| D-Galactosamine             | RP+                |
| Gluconic acid               | RP-                |
| 2-Amino-2-deoxy-D-gluconate | RP-                |
| Glucosamine                 | RP- <b>HILIC+</b>  |
| Glucosamine 6-phosphate     | RP-                |

|                                         |                       |
|-----------------------------------------|-----------------------|
| Glucose 6-phosphate                     | RP-                   |
| D-Glucuronic acid                       | RP-                   |
| L-Glutamic acid                         | <b>RP+</b> HILIC+     |
| L-Glutamine                             | <b>RP+</b> HILIC-     |
| Glyceraldehyde-3-phosphatediethylacetal | RP-                   |
| Glyceric acid                           | RP-                   |
| Glycerol                                | NMR                   |
| Glycerophosphocholine                   | RP+ <b>HILIC+</b>     |
| Glycine                                 | <b>RP+</b> HILIC+ NMR |
| Glycocholic acid                        | RP-                   |
| Guanidoacetic acid                      | HILIC+                |
| Guanine                                 | RP- <b>HILIC+</b>     |
| Guanosine                               | RP+ <b>HILIC+</b>     |
| Cyclic GMP                              | RP-                   |
| Caproic acid                            | HILIC-                |
| Hippuric acid                           | RP- <b>HILIC+</b>     |
| Histamine                               | RP+ <b>HILIC+</b>     |
| L-Histidine                             | <b>RP+</b> HILIC+     |
| L-Histidinol                            | HILIC+                |
| Homocysteine                            | RP+                   |
| Homogentisic acid                       | RP+                   |

|                                 |                              |
|---------------------------------|------------------------------|
| L-Homoserine                    | RP-                          |
| Homovanillic acid               | HILIC-                       |
| Hydroquinone                    | HILIC-                       |
| Hypoxanthine                    | <b>RP+</b> HILIC+            |
| Indoleacetaldehyde              | HILIC+                       |
| 1H-Indole-3-acetamide           | <b>RP+</b> <b>HILIC+</b>     |
| Indoleacetic acid               | <b>RP+</b> <b>HILIC-</b>     |
| Tryptophanol                    | HILIC+                       |
| Indolepyruvate                  | HILIC-                       |
| Indoxyl sulfate                 | HILIC-                       |
| Inosine                         | <b>RP-</b> HILIC-            |
| Isobutyric acid                 | HILIC- <b>NMR</b>            |
| Isocitric acid                  | RP-                          |
| L-Isoleucine                    | HILIC+ <b>NMR</b>            |
| N6-(delta2-Isopentenyl)-adenine | <b>RP-</b> <b>HILIC+</b>     |
| Isovaleric acid                 | NMR                          |
| L-Kynurenine                    | RP-                          |
| L-Lactic acid                   | <b>RP-</b> HILIC- <b>NMR</b> |
| L-Leucine                       | HILIC+                       |
| L-Norleucine                    | RP+                          |
| Leukotriene B4                  | <b>RP+</b> HILIC-            |

|                               |                   |
|-------------------------------|-------------------|
| Gamma-Linolenic acid          | HILIC+            |
| Lumichrome                    | <b>RP+</b> HILIC+ |
| L-Lysine                      | <b>RP+</b> HILIC+ |
| D-Lyxose                      | <b>RP+</b> HILIC- |
| L-Malic acid                  | RP-               |
| Maleic acid                   | HILIC-            |
| Malonic acid                  | RP-               |
| D-Maltose                     | RP-               |
| Mannitol                      | RP-               |
| D-Mannose                     | HILIC+            |
| L-Methionine                  | <b>RP+</b> HILIC+ |
| Methyl beta-D-glucopyranoside | HILIC-            |
| Methylguanidine               | HILIC+            |
| 3-Methylhistidine             | RP+               |
| Indole-3-methyl acetate       | <b>RP+</b> HILIC+ |
| N-Methyltryptamine            | <b>RP+</b> HILIC+ |
| Mono-methylglutarate          | HILIC-            |
| myo-Inositol                  | HILIC-            |
| N-Alpha-acetyllysine          | <b>RP-</b> HILIC+ |
| N-Trimethyllysine             | <b>RP+</b> HILIC+ |
| Niacinamide                   | <b>RP+</b> HILIC+ |

|                           |                       |
|---------------------------|-----------------------|
| Nicotinic acid            | <b>RP+ HILIC+</b>     |
| Norepinephrine            | RP+                   |
| L-Norvaline               | RP+ <b>HILIC+</b>     |
| Acetylcholine             | NMR                   |
| Oleic acid                | RP+ <b>HILIC+</b>     |
| 12-Hydroxydodecanoic acid | <b>RP+ HILIC-</b>     |
| Ornithine                 | RP+ <b>HILIC+</b>     |
| Orotic acid               | RP+ <b>HILIC-</b>     |
| Pantolactone              | HILIC-                |
| Pantothenic acid          | <b>RP+ HILIC+</b>     |
| Paraxanthine              | HILIC+                |
| Valeric acid              | NMR                   |
| Petroselinic acid         | HILIC-                |
| Phenylacetaldehyde        | HILIC-                |
| L-Phenylalanine           | <b>RP+ HILIC+ NMR</b> |
| 2-Hydroxyphenethylamine   | HILIC+                |
| Phosphorylcholine         | NMR                   |
| DL-O-Phosphoserine        | RP-                   |
| Picolinic acid            | HILIC+                |
| Pipecolic acid            | RP+                   |
| L-Proline                 | <b>RP+ HILIC+</b>     |

|                                    |                   |
|------------------------------------|-------------------|
| Propanal                           | HILIC+            |
| Propionic acid                     | NMR               |
| Pterin                             | <b>RP+ HILIC+</b> |
| Purine                             | <b>RP+ HILIC+</b> |
| Putrescine                         | RP+               |
| Pyridoxamine                       | RP+               |
| Pyridoxine                         | RP+               |
| Pyrrole-2-carboxylic acid          | <b>RP+ HILIC-</b> |
| Quinic acid                        | RP-               |
| 2,3-Dihydroxypropyl tetradecanoate | RP+               |
| Cortexolone                        | HILIC+            |
| Resorcinol monoacetate             | HILIC-            |
| All-trans-retinoic acid            | <b>RP+ HILIC+</b> |
| Vitamin A                          | HILIC+            |
| Rhamnose                           | HILIC-            |
| Ribitol                            | HILIC-            |
| Riboflavin                         | <b>RP+ HILIC+</b> |
| D-Ribose                           | HILIC-            |
| Rosmarinic acid                    | HILIC-            |
| Salicylamide                       | <b>RP- HILIC-</b> |
| Salicyluric acid                   | HILIC+            |

|                          |                       |
|--------------------------|-----------------------|
| Sarcosine                | HILIC-                |
| L-Serine                 | <b>RP- HILIC+</b>     |
| Serotonin                | RP+ <b>HILIC+</b>     |
| Shikimic acid            | HILIC+                |
| Spermidine               | RP+ <b>HILIC+</b>     |
| Sphinganine              | RP+                   |
| Suberic acid             | <b>RP- HILIC-</b>     |
| Succinic acid            | <b>RP- HILIC+ NMR</b> |
| Taurine                  | <b>RP- HILIC-</b>     |
| L-Threonine              | <b>RP+ HILIC+ NMR</b> |
| Thymidine                | RP- <b>HILIC-</b>     |
| Thymine                  | RP+ <b>HILIC-</b>     |
| trans-Aconitic acid      | RP-                   |
| Trigonelline             | <b>RP+ HILIC+</b>     |
| Trimethylamine           | HILIC+                |
| Tryptamine               | HILIC+                |
| L-Tryptophan             | <b>RP+ HILIC+</b>     |
| Tyramine                 | HILIC+                |
| L-Tyrosine               | <b>RP+ HILIC- NMR</b> |
| Uracil                   | RP+ <b>HILIC-</b>     |
| Uracil-5-carboxylic acid | RP+                   |

|                |                       |
|----------------|-----------------------|
| Uric acid      | RP+                   |
| Uridine        | <b>RP+</b> HILIC+     |
| 5'UMP          | HILIC+                |
| Urocanic acid  | RP+ <b>HILIC+</b>     |
| L-Valine       | <b>RP+ HILIC+ NMR</b> |
| Ergocalciferol | HILIC+                |
| Xanthine       | <b>RP+</b> HILIC-     |
